# Supplementary material for: Comprehensive bulk and single-cell transcriptome profiling give useful insights into the characteristics of osteoarthritis associated synovial macrophages
Source: Front Immunol. 2023 Jan 5;13:1078414. doi: 10.3389/fimmu.2022.1078414 (PMC9849898; doi:10.3389/fimmu.2022.1078414)
Supplement: Supplementary file 4 [file Table_2.xlsx]

## Sheet: Table S2 172 DEGs
Table S2. The 172 differentially expressed genes in GSE1919 and GSE55235
Gene Name	Gene ID	Description	Protein Function (Protein Atlas)	Subcellular Location (Protein Atlas)	Drug (DrugBank)	Canonical Pathways_x000D_
PTN	5764	pleiotrophin	Cancer-related genes:Candidate cancer biomarkers; Predicted secreted proteins	Endoplasmic reticulum (Supported)		(M251)PID SYNDECAN 3 PATHWAY; (M5883)NABA SECRETED FACTORS; (M5885)NABA MATRISOME ASSOCIATED
NPAS2	4862	neuronal PAS domain protein 2	Predicted intracellular proteins; Transcription factors:Basic domains	Nucleoplasm (Approved)		(M95)PID CIRCADIAN PATHWAY
BLNK	29760	B cell linker	Predicted intracellular proteins; Disease related genes	Cytoplasmic bodies;Plasma membrane (Supported)		(M17200)SA B CELL RECEPTOR COMPLEXES; (M3501)ST B CELL ANTIGEN RECEPTOR; (M8626)SIG BCR SIGNALING PATHWAY
TK1	7083	thymidine kinase 1	Enzymes; Predicted intracellular proteins; ENZYME proteins:Transferases; Cancer-related genes:Candidate cancer biomarkers		Dithioerythritol; Thymidine 5'-triphosphate	(M40)PID E2F PATHWAY; (M66)PID MYC ACTIV PATHWAY
AMPH	273	amphiphysin	Predicted intracellular proteins; Cancer-related genes:Mutational cancer driver genes	Cytosol (Supported); Additional: Plasma membrane		(M214)PID ERBB1 INTERNALIZATION PATHWAY
CXCL3	2921	C-X-C motif chemokine ligand 3				(M5883)NABA SECRETED FACTORS; (M5885)NABA MATRISOME ASSOCIATED; (M5889)NABA MATRISOME
ADCY7	113	adenylate cyclase 7	Enzymes; ENZYME proteins:Lyases; Predicted intracellular proteins	Cytosol (Approved)		(M56)PID LPA4 PATHWAY; (M8)PID ENDOTHELIN PATHWAY; (M15)PID LYSOPHOSPHOLIPID PATHWAY
LAMA2	3908	laminin subunit alpha 2	Predicted intracellular proteins; Disease related genes; Predicted secreted proteins			(M158)PID INTEGRIN4 PATHWAY; (M5887)NABA BASEMENT MEMBRANES; (M239)PID A6B1 A6B4 INTEGRIN PATHWAY
FOSL2	2355	FOS like 2, AP-1 transcription factor subunit	Predicted intracellular proteins; Transcription factors:Basic domains	Nucleoplasm (Enhanced)		(M65)PID FRA PATHWAY; (M236)PID DELTA NP63 PATHWAY; (M167)PID AP1 PATHWAY
ME2	4200	malic enzyme 2	Enzymes; Predicted intracellular proteins; ENZYME proteins:Oxidoreductases	Mitochondria (Supported)	NADH; Fumaric Acid; D-Malic acid; Mesoxalic acid; Tartronate
PPP1R15A	23645	protein phosphatase 1 regulatory subunit 15A	Predicted intracellular proteins; Cancer-related genes:Candidate cancer biomarkers	Vesicles (Uncertain)		(M181)PID BMP PATHWAY; (M286)PID TGFBR PATHWAY
NID1	4811	nidogen 1	Predicted secreted proteins		Urokinase	(M5887)NABA BASEMENT MEMBRANES; (M18)PID INTEGRIN1 PATHWAY; (M3008)NABA ECM GLYCOPROTEINS
CD4	920	CD4 molecule	FDA approved drug targets:Biotech drugs; CD markers; Predicted intracellular proteins	Plasma membrane (Supported)	Antithymocyte immunoglobulin (rabbit); Clenoliximab; Ibalizumab	(M243)PID ARF 3PATHWAY; (M290)PID IL12 STAT4 PATHWAY; (M196)PID IL23 PATHWAY
MARCKS	4082	myristoylated alanine rich protein kinase C substrate	Predicted intracellular proteins	Plasma membrane (Approved); Additional: Cytosol;Endoplasmic reticulum;Nucleoplasm
SORL1	6653	sortilin related receptor 1	Disease related genes; Predicted secreted proteins
PLK2	10769	polo like kinase 2	Enzymes; Predicted intracellular proteins; Kinases; ENZYME proteins:Transferases	Cytosol;Mitochondria;Nucleoplasm (Approved)	Fostamatinib
FADS1	3992	fatty acid desaturase 1	Predicted intracellular proteins; FDA approved drug targets:Small molecule drugs		alpha-Linolenic acid; Icosapent
DDIT4	54541	DNA damage inducible transcript 4	Predicted intracellular proteins	Cytosol (Supported)		(M121)PID MTOR 4PATHWAY; (M145)PID P53 DOWNSTREAM PATHWAY
CLDN5	7122	claudin 5	Transporters:Transporter channels and pores
AKR1B10	57016	aldo-keto reductase family 1 member B10	Predicted intracellular proteins; Predicted secreted proteins	Cytosol (Supported); Additional: Plasma membrane	Sulindac; Fidarestat; Tolrestat; Nicotinamide adenine dinucleotide phosphate; Exisulind; Zopolrestat
CDO1	1036	cysteine dioxygenase type 1	Enzymes; Predicted intracellular proteins; ENZYME proteins:Oxidoreductases	Nucleoplasm (Uncertain); Additional: Cytosol	Cysteine; NADH
SLC23A2	9962	solute carrier family 23 member 2	Transporters:Electrochemical Potential-driven transporters	Vesicles (Uncertain); Additional: Golgi apparatus
BTC	685	betacellulin	Predicted intracellular proteins; Predicted secreted proteins			(M201)PID ERBB NETWORK PATHWAY; (M13)PID ERBB4 PATHWAY; (M5883)NABA SECRETED FACTORS
GADD45A	1647	growth arrest and DNA damage inducible alpha	Predicted intracellular proteins; Cancer-related genes:Candidate cancer biomarkers	Nuclear speckles (Supported)		(M20)PID P38 MKK3 6PATHWAY; (M242)PID AURORA A PATHWAY; (M12012)ST P38 MAPK PATHWAY
RAC2	5880	Rac family small GTPase 2	Predicted intracellular proteins; RAS pathway related proteins; Disease related genes			(M210)PID IL8 CXCR2 PATHWAY
CFI	3426	complement factor I	Peptidases:Serine-type peptidases; Potential drug targets; ENZYME proteins:Hydrolases; Enzymes; Disease related genes; Predicted secreted proteins		Zinc; Copper; Zinc acetate
ATF3	467	activating transcription factor 3	Predicted intracellular proteins; Transcription factors:Basic domains	Nucleoli;Nucleoplasm (Supported)		(M166)PID ATF2 PATHWAY; (M167)PID AP1 PATHWAY; (M2)PID SMAD2 3NUCLEAR PATHWAY
SLC7A5	8140	solute carrier family 7 member 5	Transporters:Electrochemical Potential-driven transporters	Cytosol;Plasma membrane (Supported); Additional: Vesicles
SCG2	7857	secretogranin II	Predicted secreted proteins	Golgi apparatus (Approved); Additional: Vesicles
CDON	50937	cell adhesion associated, oncogene regulated	Predicted intracellular proteins; Disease related genes			(M211)PID HEDGEHOG 2PATHWAY
SELL	6402	selectin L	CD markers; Candidate cardiovascular disease genes; Cancer-related genes:Candidate cancer biomarkers	Cytosol (Uncertain)		(M11736)SA MMP CYTOKINE CONNECTION
ACKR1	2532	atypical chemokine receptor 1 (Duffy blood group)	CD markers; Blood group antigen proteins; G-protein coupled receptors:GPCRs excl olfactory receptors; G-protein coupled receptors:Chemokines and chemotactic factors receptors
PIGA	5277	phosphatidylinositol glycan anchor biosynthesis class A	Predicted intracellular proteins; Potential drug targets; Enzymes; Disease related genes; ENZYME proteins:Transferases
IL1R2	7850	interleukin 1 receptor type 2	CD markers; Cancer-related genes:Candidate cancer biomarkers; Predicted secreted proteins			(M110)PID IL1 PATHWAY
NELL1	4745	neural EGFL like 1	Predicted secreted proteins			(M3008)NABA ECM GLYCOPROTEINS; (M5884)NABA CORE MATRISOME; (M5889)NABA MATRISOME
MAOA	4128	monoamine oxidase A	Enzymes; FDA approved drug targets:Small molecule drugs; ENZYME proteins:Oxidoreductases; Disease related genes	Mitochondria (Enhanced); Additional: Cytosol	Amphetamine; Phentermine; Procaine; Tranylcypromine; Phenelzine; Minaprine; Zonisamide; Selegiline; Procarbazine; Moclobemide; Isocarboxazid; Ephedra sinica root; MMDA; 4-Methoxyamphetamine; Metamfetamine; Pargyline; Flavin adenine dinucleotide; Clorgiline; Nialamide; Nomifensine; Zimelidine; Posizolid; CX157; Decyl(dimethyl)phosphine oxide; Harmine; Pirlindole; Toloxatone; Brofaromine; Flortauci…
FIGF	2277	vascular endothelial growth factor D	RAS pathway related proteins; Cancer-related genes:Candidate cancer biomarkers; Predicted secreted proteins			(M137)PID VEGF VEGFR PATHWAY; (M118)PID INTEGRIN A9B1 PATHWAY; (M274)PID LYMPH ANGIOGENESIS PATHWAY
DDX3Y	8653	DEAD-box helicase 3 Y-linked	Predicted intracellular proteins; Potential drug targets; ENZYME proteins:Hydrolases; Enzymes; Disease related genes	Cytosol (Supported); Additional: Nucleoplasm
PLA2G15	23659	phospholipase A2 group XV	Predicted intracellular proteins	Nucleoplasm;Vesicles (Supported)
SEMA3A	10371	semaphorin 3A	Predicted intracellular proteins; Disease related genes; Predicted secreted proteins	Vesicles (Approved); Additional: Nucleoplasm		(M5880)NABA ECM AFFILIATED; (M5885)NABA MATRISOME ASSOCIATED; (M5889)NABA MATRISOME
RARRES3	5920	phospholipase A and acyltransferase 4	Predicted intracellular proteins
PLIN2	123	perilipin 2	Predicted intracellular proteins	Lipid droplets (Supported)		(M255)PID HIF1 TFPATHWAY
KIF11	3832	kinesin family member 11	Predicted intracellular proteins; Disease related genes	Cytosol (Supported); Additional: Mitotic spindle	3-[(5s)-1-Acetyl-3-(2-Chlorophenyl)-4,5-Dihydro-1h-Pyrazol-5-Yl]Phenol; Monastrol; Filanesib; (4R)-4-(3-HYDROXYPHENYL)-N,N,7,8-TETRAMETHYL-3,4-DIHYDROISOQUINOLINE-2(1H)-CARBOXAMIDE; N,N-DIETHYL-2-[(2-THIENYLCARBONYL)AMINO]-4,5,6,7-TETRAHYDRO-1-BENZOTHIOPHENE-3-CARBOXAMIDE; (5R)-N,N-DIETHYL-5-METHYL-2-[(THIOPHEN-2-YLCARBONYL)AMINO]-4,5,6,7-TETRAHYDRO-1-BENZOTHIOPHENE-3-CARBOXAMIDE; MK-0731; [(4R)-…
SLC2A3	6515	solute carrier family 2 member 3	Transporters:Electrochemical Potential-driven transporters	Plasma membrane (Approved)
PTHLH	5744	parathyroid hormone like hormone	Disease related genes; Cancer-related genes:Candidate cancer biomarkers; Predicted secreted proteins	Cytosol;Nucleoplasm (Supported); Additional: Golgi apparatus		(M211)PID HEDGEHOG 2PATHWAY
DUSP5	1847	dual specificity phosphatase 5	Enzymes; Predicted intracellular proteins; ENZYME proteins:Hydrolases			(M166)PID ATF2 PATHWAY; (M145)PID P53 DOWNSTREAM PATHWAY
MGAT4C	25834	MGAT4 family member C	Enzymes; ENZYME proteins:Transferases	Plasma membrane;Vesicles (Approved); Additional: Centriolar satellite
LRRC17	10234	leucine rich repeat containing 17	Predicted secreted proteins	Vesicles (Approved); Additional: Cytokinetic bridge
EPYC	1833	epiphycan	Predicted secreted proteins			(M5882)NABA PROTEOGLYCANS; (M5884)NABA CORE MATRISOME; (M5889)NABA MATRISOME
DUSP2	1844	dual specificity phosphatase 2	Enzymes; Predicted intracellular proteins; ENZYME proteins:Hydrolases	Nuclear membrane (Supported); Additional: Nucleoplasm
CORO1A	11151	coronin 1A	Predicted intracellular proteins; Disease related genes	Cytosol (Approved)
MDK	4192	midkine	Cancer-related genes:Candidate cancer biomarkers; Predicted secreted proteins	Vesicles (Approved)		(M165)PID SYNDECAN 4 PATHWAY; (M277)PID INTEGRIN A4B1 PATHWAY; (M18)PID INTEGRIN1 PATHWAY
APOD	347	apolipoprotein D	Candidate cardiovascular disease genes; Cancer-related genes:Candidate cancer biomarkers; Predicted secreted proteins	Plasma membrane (Approved)	Vitamin A; Copper
ANGPTL7	10218	angiopoietin like 7	Predicted secreted proteins			(M5883)NABA SECRETED FACTORS; (M5885)NABA MATRISOME ASSOCIATED; (M5889)NABA MATRISOME
IGLC1	3537	immunoglobulin lambda constant 1
CD52	1043	CD52 molecule	FDA approved drug targets:Biotech drugs; CD markers; Cancer-related genes:Candidate cancer biomarkers		Alemtuzumab
CPA3	1359	carboxypeptidase A3	Enzymes; Peptidases:Metallopeptidases; ENZYME proteins:Hydrolases; Predicted secreted proteins	Golgi apparatus (Approved); Additional: Nucleoplasm
ICAM1	3383	intercellular adhesion molecule 1	CD markers; Predicted intracellular proteins; FDA approved drug targets:Small molecule drugs; Cancer-related genes:Candidate cancer biomarkers; Candidate cardiovascular disease genes	Cytosol;Plasma membrane (Approved)	Natalizumab; Hyaluronic acid; Nafamostat	(M169)PID INTEGRIN2 PATHWAY; (M159)PID AMB2 NEUTROPHILS PATHWAY; (M99)PID TXA2PATHWAY
TSC22D3	1831	TSC22 domain family member 3	Predicted intracellular proteins; Transcription factors:Basic domains	Cytosol (Approved); Additional: Golgi apparatus;Nuclear speckles
ETS2	2114	ETS proto-oncogene 2, transcription factor	Transcription factors:Helix-turn-helix domains; Predicted intracellular proteins; RAS pathway related proteins	Nucleoplasm (Enhanced); Additional: Cytosol;Plasma membrane		(M195)PID CMYB PATHWAY
KAL1	3730	anosmin 1	Disease related genes; Predicted secreted proteins			(M3008)NABA ECM GLYCOPROTEINS; (M5884)NABA CORE MATRISOME; (M5889)NABA MATRISOME
NFIL3	4783	nuclear factor, interleukin 3 regulated	Predicted intracellular proteins; Transcription factors:Basic domains	Nuclear bodies (Approved)
NID2	22795	nidogen 2	Predicted intracellular proteins; Predicted secreted proteins	Plasma membrane (Enhanced)		(M5887)NABA BASEMENT MEMBRANES; (M3008)NABA ECM GLYCOPROTEINS; (M5884)NABA CORE MATRISOME
PPAP2B	8613	phospholipid phosphatase 3	Enzymes; ENZYME proteins:Hydrolases	Golgi apparatus (Supported)
BTN3A3	10384	butyrophilin subfamily 3 member A3	Predicted intracellular proteins
H1FX	8971	H1.10 linker histone	Predicted intracellular proteins	Nucleoli;Nucleoli rim;Nucleoplasm (Enhanced)
LRMP	4033	inositol 1,4,5-triphosphate receptor associated 2	Predicted intracellular proteins	Vesicles (Uncertain); Additional: Cytosol;Nucleoplasm
SPRY2	10253	sprouty RTK signaling antagonist 2	Disease related genes	Actin filaments;Microtubules (Supported)		(M214)PID ERBB1 INTERNALIZATION PATHWAY; (M50)PID PTP1B PATHWAY; (M276)PID FGF PATHWAY
TNFRSF11A	8792	TNF receptor superfamily member 11a	CD markers; Predicted intracellular proteins; Disease related genes	Plasma membrane (Supported); Additional: Cytosol	ENMD-1198
PLXNC1	10154	plexin C1	CD markers; Predicted intracellular proteins	Mitochondria (Approved)		(M5880)NABA ECM AFFILIATED; (M5885)NABA MATRISOME ASSOCIATED; (M5889)NABA MATRISOME
SCRG1	11341	stimulator of chondrogenesis 1	Predicted secreted proteins
CXCL8	3576	C-X-C motif chemokine ligand 8	Candidate cardiovascular disease genes; Cancer-related genes:Candidate cancer biomarkers; Predicted secreted proteins		ABT-510; MDX-018; Rivanicline; Tapinarof	(M251)PID SYNDECAN 3 PATHWAY; (M252)PID IL8 CXCR1 PATHWAY; (M240)PID SYNDECAN 2 PATHWAY
FLRT2	23768	fibronectin leucine rich transmembrane protein 2
GLRX	2745	glutaredoxin	Predicted intracellular proteins	Cytosol;Plasma membrane (Supported)	Glutathione
MNDA	4332	myeloid cell nuclear differentiation antigen	Predicted intracellular proteins	Nucleoplasm (Supported); Additional: Cytosol;Nucleoli;Nucleoli rim;Vesicles
HK3	3101	hexokinase 3	Enzymes; Predicted intracellular proteins; ENZYME proteins:Transferases
ZFP36L2	678	ZFP36 ring finger protein like 2	Predicted intracellular proteins; Cancer-related genes:Mutational cancer driver genes; Disease related genes
RBPMS	11030	RNA binding protein, mRNA processing factor	Predicted intracellular proteins	Nucleoplasm (Supported); Additional: Cytosol
PIM1	5292	Pim-1 proto-oncogene, serine/threonine kinase	Predicted intracellular proteins; Enzymes; Kinases:CAMK Ser/Thr protein kinases; Cancer-related genes:Candidate cancer biomarkers; ENZYME proteins:Transferases	Cytosol (Supported); Additional: Nucleoli	3,4-Dihydroxy-1-Methylquinolin-2(1h)-One; Staurosporine; LY-294002; Imidazole; (3e)-3-[(4-Hydroxyphenyl)Imino]-1h-Indol-2(3h)-One; Bisindolylmaleimide I; Quercetin; Phosphoaminophosphonic Acid-Adenylate Ester; Dexfosfoserine; S,S-(2-Hydroxyethyl)Thiocysteine; IMIDAZOPYRIDAZIN 1; 4-(4-hydroxy-3-methylphenyl)-6-phenylpyrimidin-2(5H)-one; (4R)-7,8-dichloro-1',9-dimethyl-1-oxo-1,2,4,9-tetrahydrospiro…	(M135)PID IL5 PATHWAY; (M182)PID IL3 PATHWAY; (M22)PID GMCSF PATHWAY
KLF6	1316	Kruppel like factor 6	Predicted intracellular proteins; Cancer-related genes; Transcription factors:Zinc-coordinating DNA-binding domains; Disease related genes	Nucleoplasm (Supported); Additional: Cytosol;Nucleoli;Vesicles		(M4910)ST ERK1 ERK2 MAPK PATHWAY
CD180	4064	CD180 molecule	CD markers
SV2B	9899	synaptic vesicle glycoprotein 2B
RRAD	6236	RRAD, Ras related glycolysis inhibitor and calcium channel regulator	Predicted intracellular proteins	Plasma membrane (Approved); Additional: Golgi apparatus;Nucleoplasm		(M236)PID DELTA NP63 PATHWAY
SERPINE1	5054	serpin family E member 1	Disease related genes; Cancer-related genes:Candidate cancer biomarkers; FDA approved drug targets:Biotech drugs; Candidate cardiovascular disease genes; Predicted secreted proteins	Cytosol (Approved)	Alteplase; Urokinase; Reteplase; Anistreplase; Tenecteplase; Drotrecogin alfa; Troglitazone; Fibrinolysin; Copper	(M44)PID HIF2PATHWAY; (M174)PID UPA UPAR PATHWAY; (M255)PID HIF1 TFPATHWAY
MTHFD2	10797	methylenetetrahydrofolate dehydrogenase (NADP+ dependent) 2, methenyltetrahydrofolate cyclohydrolase	ENZYME proteins:Oxidoreductases; Predicted intracellular proteins; ENZYME proteins:Hydrolases; Enzymes	Mitochondria (Supported)	Tetrahydrofolic acid; NADH
VCAM1	7412	vascular cell adhesion molecule 1	CD markers; Cancer-related genes:Candidate cancer biomarkers	Cell Junctions (Supported)	Ethanol; Carvedilol; Succinobucol; Clove oil	(M212)PID INTEGRIN5 PATHWAY; (M267)PID ANTHRAX PATHWAY; (M118)PID INTEGRIN A9B1 PATHWAY
CEBPD	1052	CCAAT enhancer binding protein delta	Predicted intracellular proteins; Transcription factors:Basic domains	Nucleoplasm (Approved)		(M106)PID HNF3B PATHWAY; (M183)PID IL6 7 PATHWAY; (M236)PID DELTA NP63 PATHWAY
CSN1S1	1446	casein alpha s1	Predicted intracellular proteins; Cancer-related genes:Candidate cancer biomarkers; Predicted secreted proteins
IGHM	3507	immunoglobulin heavy constant mu
GABRB1	2560	gamma-aminobutyric acid type A receptor subunit beta1	FDA approved drug targets:Small molecule drugs; Predicted intracellular proteins; Disease related genes		Lindane; Ethanol; gamma-Hydroxybutyric acid; Fludiazepam
LCK	3932	LCK proto-oncogene, Src family tyrosine kinase	Predicted intracellular proteins; FDA approved drug targets:Small molecule drugs; Enzymes; Cancer-related genes; Disease related genes; Kinases:Tyr protein kinases; ENZYME proteins:Transferases	Golgi apparatus (Approved)	Dasatinib; AP-22408; Staurosporine; 1-Tert-Butyl-3-(4-Chloro-Phenyl)-1h-Pyrazolo[3,4-D]Pyrimidin-4-Ylamine; {4-[(2S)-2-Acetamido-3-({(1S)-1-[3-carbamoyl-4-(cyclohexylmethoxy)phenyl]ethyl}amino)-3-oxopropyl]-2-phosphonophenoxy}acetic acid; Phosphoaminophosphonic Acid-Adenylate Ester; 3-(2-AMINOQUINAZOLIN-6-YL)-4-METHYL-N-[3-(TRIFLUOROMETHYL)PHENYL]BENZAMIDE; 2,3-DIPHENYL-N-(2-PIPERAZIN-1-YLETHYL)F…	(M26)PID NFKAPPAB ATYPICAL PATHWAY; (M33)PID GLYPICAN 1PATHWAY; (M76)PID P38 ALPHA BETA PATHWAY
TTC3	7267	tetratricopeptide repeat domain 3	Enzymes; Predicted intracellular proteins; ENZYME proteins:Transferases	Nucleoli;Nucleoplasm (Approved); Additional: Cytosol
STC1	6781	stanniocalcin 1	Predicted intracellular proteins; Predicted secreted proteins
MIR6883	102465532	microRNA 6883
CPVL	54504	carboxypeptidase vitellogenic like	Enzymes; Peptidases:Serine-type peptidases; Predicted intracellular proteins	Endoplasmic reticulum (Supported)
HERC4	26091	HECT and RLD domain containing E3 ubiquitin protein ligase 4	Enzymes; Predicted intracellular proteins; ENZYME proteins:Transferases	Cytosol (Supported); Additional: Nucleoli fibrillar center
ADH1B	125	alcohol dehydrogenase 1B (class I), beta polypeptide	Enzymes; Predicted intracellular proteins; ENZYME proteins:Oxidoreductases; FDA approved drug targets:Small molecule drugs	Cytosol;Plasma membrane (Approved)	NADH; Fomepizole; N-Benzylformamide; 4-Iodopyrazole; Nicotinamide adenine dinucleotide phosphate; Cyclohexanol; N-Heptylformamide; Glycerin
TRIL	9865	TLR4 interactor with leucine rich repeats
CDKN1A	1026	cyclin dependent kinase inhibitor 1A	Cancer-related genes:Mutated cancer genes; Predicted intracellular proteins; Cancer-related genes:Mutational cancer driver genes; Cancer-related genes:Candidate cancer biomarkers	Nuclear bodies;Nucleoplasm (Supported)	Arsenic trioxide	(M10154)SA G2 AND M PHASES; (M1529)SA G1 AND S PHASES; (M18895)SA TRKA RECEPTOR
LDLR	3949	low density lipoprotein receptor	Predicted intracellular proteins; Disease related genes		Porfimer sodium
SDC4	6385	syndecan 4	Transporters; Cancer-related genes; Predicted secreted proteins	Golgi apparatus (Approved); Additional: Plasma membrane		(M165)PID SYNDECAN 4 PATHWAY; (M53)PID INTEGRIN3 PATHWAY; (M5880)NABA ECM AFFILIATED
LMOD1	25802	leiomodin 1	Predicted intracellular proteins	Cytosol (Approved)
ZBTB16	7704	zinc finger and BTB domain containing 16	Disease related genes; Predicted intracellular proteins; Transcription factors:Zinc-coordinating DNA-binding domains; Cancer-related genes:Candidate cancer biomarkers
ABCC3	8714	ATP binding cassette subfamily C member 3	Predicted intracellular proteins; Transporters:Primary Active Transporters; Cancer-related genes:Candidate cancer biomarkers	Plasma membrane (Supported)
HLA-DMB	3109	major histocompatibility complex, class II, DM beta	Predicted intracellular proteins	Vesicles (Supported)
NREP	9315	neuronal regeneration related protein	Predicted intracellular proteins	Vesicles (Approved)
CSRP2	1466	cysteine and glycine rich protein 2	Predicted intracellular proteins			(M166)PID ATF2 PATHWAY
OSBPL3	26031	oxysterol binding protein like 3	Predicted intracellular proteins	Cytosol (Supported); Additional: Nucleoli
HSPA6	3310	heat shock protein family A (Hsp70) member 6	Predicted intracellular proteins	Vesicles (Approved); Additional: Nucleoplasm
SYT17	51760	synaptotagmin 17	Predicted intracellular proteins	Cytosol;Nucleoplasm (Approved)
ADM	133	adrenomedullin	Predicted intracellular proteins; Cancer-related genes:Candidate cancer biomarkers; Predicted secreted proteins			(M255)PID HIF1 TFPATHWAY
CCL20	6364	C-C motif chemokine ligand 20	Predicted secreted proteins			(M5883)NABA SECRETED FACTORS; (M5885)NABA MATRISOME ASSOCIATED; (M5889)NABA MATRISOME
FAM107A	11170	family with sequence similarity 107 member A	Predicted intracellular proteins	Nuclear speckles (Supported)
ZNF135	7694	zinc finger protein 135	Predicted intracellular proteins; Transcription factors:Zinc-coordinating DNA-binding domains	Cytosol (Approved)
NCF1	653361	neutrophil cytosolic factor 1	Predicted intracellular proteins; Disease related genes			(M278)PID RAC1 PATHWAY
HPGDS	27306	hematopoietic prostaglandin D synthase	Enzymes; Predicted intracellular proteins; ENZYME proteins:Isomerase; ENZYME proteins:Transferases	Cytosol;Vesicles (Approved); Additional: Nucleoplasm	Glutathione; Tretinoin; 2-(2f-Benzothiazolyl)-5-Styryl-3-(4f-Phthalhydrazidyl)Tetrazolium Chloride; 3-phenyl-5-(1H-pyrazol-3-yl)isoxazole; PHENYL-5-(1H-PYRAZOL-3-YL)-1,3-THIAZOLE; Tranilast; 4-{[4-(4-fluoro-3-methylphenyl)-1,3-thiazol-2-yl]amino}-2-hydroxybenzoic acid; 4-(BENZHYDRYLOXY)-1-[3-(1H-TETRAAZOL-5-YL)PROPYL]PIPERIDINE; Nocodazole; 3-(4-nitrophenyl)-1H-pyrazole; 1-PHENYL-1H-PYRAZOLE-4-CA…
LIPA	3988	lipase A, lysosomal acid type	Predicted intracellular proteins; Potential drug targets; ENZYME proteins:Hydrolases; Enzymes; Disease related genes	Cytosol;Vesicles (Supported); Additional: Nucleoli fibrillar center;Nucleoplasm
ADH1C	126	alcohol dehydrogenase 1C (class I), gamma polypeptide	Enzymes; Predicted intracellular proteins; ENZYME proteins:Oxidoreductases; FDA approved drug targets:Small molecule drugs	Cytosol;Plasma membrane (Supported)	NADH; Fomepizole; 2,3,4,5,6-Pentafluorobenzyl Alcohol; N-1-methylheptylformamide; 2-Ethoxyethanol; Cholic Acid; 4-Iodopyrazole; Pyrazole; Para-Bromobenzyl Alcohol; 3-Butylthiolane 1-Oxide; 5-beta-D-ribofuranosylnicotinamide adenine dinucleotide; (R)-N-(1-Methyl-Hexyl)-Formamide; Trifluoroethanol; Cyclohexylformamide; Cpad; N-Formylpiperidine; 2,3-Difluorobenzyl Alcohol; 2,4-Difluorobenzyl Alcohol…
GAMT	2593	guanidinoacetate N-methyltransferase	Predicted intracellular proteins; FDA approved drug targets:Small molecule drugs; Enzymes; Disease related genes; ENZYME proteins:Transferases		Creatine; Guanidine; S-adenosyl-L-homocysteine; Glycocyamine; Phosphocreatine
ANK3	288	ankyrin 3	Cancer-related genes:Mutated cancer genes; Predicted intracellular proteins; Disease related genes	Plasma membrane (Supported)
FOSB	2354	FosB proto-oncogene, AP-1 transcription factor subunit	Predicted intracellular proteins; Transcription factors:Basic domains	Nucleoplasm (Supported); Additional: Vesicles		(M167)PID AP1 PATHWAY
FCGR3A	2214	Fc fragment of IgG receptor IIIa	FDA approved drug targets:Biotech drugs; CD markers; Disease related genes; Predicted secreted proteins		Cetuximab; Etanercept; Human immunoglobulin G; Gemtuzumab ozogamicin; Alemtuzumab; Alefacept; Palivizumab; Daclizumab; Bevacizumab; Catumaxomab; Sarilumab; Benralizumab	(M11736)SA MMP CYTOKINE CONNECTION
IL1B	3553	interleukin 1 beta	Predicted intracellular proteins; FDA approved drug targets:Small molecule drugs; Transporters:Transporter channels and pores; Cancer-related genes:Candidate cancer biomarkers; FDA approved drug targets:Biotech drugs; Candidate cardiovascular disease genes; Predicted secreted proteins		Donepezil; Minocycline; VP025; Gallium nitrate; Talmapimod; Etiprednol dicloacetate; VX-702; VX-765; Andrographolide; Canakinumab; Rilonacept; Foreskin keratinocyte (neonatal); Binimetinib; Gevokizumab; Dilmapimod	(M11736)SA MMP CYTOKINE CONNECTION; (M267)PID ANTHRAX PATHWAY; (M36)PID IL27 PATHWAY
LTC4S	4056	leukotriene C4 synthase	Enzymes; ENZYME proteins:Lyases; Disease related genes; Potential drug targets	Nucleoplasm (Approved); Additional: Cytosol;Endoplasmic reticulum	Glutathione; Azelastine
TAC1	6863	tachykinin precursor 1	Predicted secreted proteins
HSPA1A	3303	heat shock protein family A (Hsp70) member 1A	Predicted intracellular proteins	Nucleoplasm;Vesicles (Approved); Additional: Cytosol
FKBP5	2289	FKBP prolyl isomerase 5	Enzymes; Predicted intracellular proteins; ENZYME proteins:Isomerase; Cancer-related genes:Candidate cancer biomarkers	Nucleoplasm (Enhanced)		(M115)PID REG GR PATHWAY
AGTR1	185	angiotensin II receptor type 1	Transporters; FDA approved drug targets:Small molecule drugs; G-protein coupled receptors:GPCRs excl olfactory receptors; Disease related genes	Vesicles (Uncertain)	Valsartan; Olmesartan; Losartan; Candesartan cilexetil; Eprosartan; Telmisartan; Irbesartan; Forasartan; Saprisartan; Tasosartan; CYT006-AngQb; Azilsartan medoxomil; Fimasartan; Angiotensin II; Candesartan	(M86)PID ARF6 PATHWAY; (M67)PID ARF6 TRAFFICKING PATHWAY; (M92)PID ANGIOPOIETIN RECEPTOR PATHWAY
WIF1	11197	WNT inhibitory factor 1	Predicted intracellular proteins; Cancer-related genes; Predicted secreted proteins			(M77)PID WNT SIGNALING PATHWAY; (M17761)ST WNT BETA CATENIN PATHWAY; (M70)PID PS1 PATHWAY
TYMS	7298	thymidylate synthetase	Predicted intracellular proteins; FDA approved drug targets:Small molecule drugs; Enzymes; Cancer-related genes:Candidate cancer biomarkers; ENZYME proteins:Transferases		Raltitrexed; Floxuridine; Trifluridine; Gemcitabine; Fluorouracil; Methotrexate; Pemetrexed; Capecitabine; Thymidine monophosphate; 10-Propargyl-5,8-Dideazafolic Acid; Deoxyuridine monophosphate; S,S-(2-Hydroxyethyl)Thiocysteine; Thymectacin; ANX-510; OSI-7904L; Pralatrexate; 2,4-Diamino-5-phenyl-6-ethylpyrimidine; N-[2-Chloro-5-(trifluoromethyl)phenyl]imidodicarbonimidic diamide; N-(3,5-dimethox…	(M40)PID E2F PATHWAY
MXRA5	25878	matrix remodeling associated 5	Cancer-related genes:Mutated cancer genes; Disease related genes; Predicted secreted proteins	Mitochondria (Uncertain)		(M3008)NABA ECM GLYCOPROTEINS; (M5884)NABA CORE MATRISOME; (M5889)NABA MATRISOME
GAP43	2596	growth associated protein 43	Predicted intracellular proteins; Transporters:Transporter channels and pores	Plasma membrane (Enhanced)		(M266)PID NCADHERIN PATHWAY
PTX3	5806	pentraxin 3	Predicted secreted proteins	Plasma membrane (Approved)		(M2701)ST MYOCYTE AD PATHWAY; (M19043)ST ADRENERGIC
TIMP4	7079	TIMP metallopeptidase inhibitor 4	Predicted secreted proteins			(M3468)NABA ECM REGULATORS; (M5885)NABA MATRISOME ASSOCIATED; (M5889)NABA MATRISOME
FOXO3	2309	forkhead box O3	Transcription factors:Helix-turn-helix domains; Disease related genes; Predicted intracellular proteins; Cancer-related genes:Candidate cancer biomarkers	Nucleoplasm (Enhanced)		(M32)PID HDAC CLASSIII PATHWAY; (M143)PID IL2 PI3K PATHWAY; (M249)PID PI3KCI AKT PATHWAY
CX3CR1	1524	C-X3-C motif chemokine receptor 1	Potential drug targets; G-protein coupled receptors:Chemokines and chemotactic factors receptors; G-protein coupled receptors:GPCRs excl olfactory receptors; Disease related genes	Plasma membrane (Approved)
ITGB2	3689	integrin subunit beta 2	CD markers; Predicted intracellular proteins; Disease related genes	Plasma membrane (Supported); Additional: Rods & Rings		(M47)PID INTEGRIN CS PATHWAY; (M169)PID INTEGRIN2 PATHWAY; (M159)PID AMB2 NEUTROPHILS PATHWAY
BCL6	604	BCL6 transcription repressor	Disease related genes; Predicted intracellular proteins; Transcription factors:Zinc-coordinating DNA-binding domains; Cancer-related genes:Candidate cancer biomarkers	Nucleoplasm (Supported)		(M30)PID HDAC CLASSII PATHWAY; (M136)PID FOXO PATHWAY; (M28)PID IL4 2PATHWAY
TRIM14	9830	tripartite motif containing 14	Predicted intracellular proteins
CDH11	1009	cadherin 11	Predicted intracellular proteins; Cancer-related genes; Disease related genes		Celecoxib
C10orf10	11067	DEPP1 autophagy regulator	Predicted intracellular proteins	Mitochondria (Supported); Additional: Vesicles
NDC80	10403	NDC80 kinetochore complex component	Predicted intracellular proteins	Nucleoplasm (Supported); Additional: Centrosome		(M14)PID AURORA B PATHWAY; (M129)PID PLK1 PATHWAY
HIST1H1C	3006	H1.2 linker histone, cluster member	Predicted intracellular proteins	Nucleoli rim;Nucleoplasm (Supported)
DOCK4	9732	dedicator of cytokinesis 4	Predicted intracellular proteins	Nucleoli;Plasma membrane (Approved); Additional: Cytosol;Golgi apparatus		(M186)PID PDGFRB PATHWAY
MYC	4609	MYC proto-oncogene, bHLH transcription factor	Disease related genes; Predicted intracellular proteins; Transcription factors:Basic domains; Cancer-related genes:Candidate cancer biomarkers	Nucleoplasm (Enhanced)	Acetylsalicylic acid; Nadroparin	(M139)PID MYC PATHWAY; (M234)PID IL2 STAT5 PATHWAY; (M45)PID CD40 PATHWAY
STMN2	11075	stathmin 2	Predicted intracellular proteins	Vesicles (Approved); Additional: Endoplasmic reticulum
RPS4Y1	6192	ribosomal protein S4 Y-linked 1	Ribosomal proteins; Predicted intracellular proteins
MT1X	4501	metallothionein 1X	Predicted intracellular proteins
WASF3	10810	WASP family member 3	Cancer-related genes:Mutated cancer genes; Predicted intracellular proteins
INHBB	3625	inhibin subunit beta B	Cancer-related genes:Candidate cancer biomarkers; Predicted secreted proteins			(M5883)NABA SECRETED FACTORS; (M5885)NABA MATRISOME ASSOCIATED; (M5889)NABA MATRISOME
KDELR3	11015	KDEL endoplasmic reticulum protein retention receptor 3		Endoplasmic reticulum (Supported)
KLF9	687	Kruppel like factor 9	Predicted intracellular proteins; Transcription factors:Zinc-coordinating DNA-binding domains	Nucleoplasm (Supported); Additional: Cytosol;Plasma membrane
AOX1	316	aldehyde oxidase 1	Enzymes; Predicted intracellular proteins; ENZYME proteins:Oxidoreductases		Cyclobenzaprine; Eniluracil
COL1A2	1278	collagen type I alpha 2 chain	Disease related genes; Cancer-related genes:Candidate cancer biomarkers; Predicted secreted proteins	Endoplasmic reticulum (Supported)	Collagenase clostridium histolyticum	(M274)PID LYMPH ANGIOGENESIS PATHWAY; (M65)PID FRA PATHWAY; (M53)PID INTEGRIN3 PATHWAY
MAFF	23764	MAF bZIP transcription factor F	Predicted intracellular proteins; Transcription factors:Basic domains	Nucleoplasm (Approved); Additional: Mitochondria
TNFAIP3	7128	TNF alpha induced protein 3	Predicted intracellular proteins; Potential drug targets; ENZYME proteins:Hydrolases; Enzymes; Disease related genes; Cancer-related genes:Candidate cancer biomarkers; Peptidases:Cysteine-type peptidases	Centrosome;Cytosol (Approved)		(M37)PID NFKAPPAB CANONICAL PATHWAY; (M18030)ST TUMOR NECROSIS FACTOR PATHWAY; (M45)PID CD40 PATHWAY
IFRD1	3475	interferon related developmental regulator 1	Predicted intracellular proteins	Cytosol;Plasma membrane (Approved)
SIK1	150094	salt inducible kinase 1	Predicted intracellular proteins; Potential drug targets; Enzymes; Kinases:CAMK Ser/Thr protein kinases; Disease related genes; ENZYME proteins:Transferases	Nucleoplasm (Approved); Additional: Vesicles	Dabrafenib; Fostamatinib	(M87)PID LKB1 PATHWAY
GPM6A	2823	glycoprotein M6A	Predicted intracellular proteins
MMP1	4312	matrix metallopeptidase 1	FDA approved drug targets:Small molecule drugs; ENZYME proteins:Hydrolases; Enzymes; Peptidases:Metallopeptidases; Cancer-related genes:Candidate cancer biomarkers; Candidate cardiovascular disease genes; Predicted secreted proteins	Vesicles (Approved)	Marimastat; CGS-27023; N-[3-(N'-HYDROXYCARBOXAMIDO)-2-(2-METHYLPROPYL)-PROPANOYL]-O-TYROSINE-N-METHYLAMIDE; METHYLAMINO-PHENYLALANYL-LEUCYL-HYDROXAMIC ACID; [[1-[N-HYDROXY-ACETAMIDYL]-3-METHYL-BUTYL]-CARBONYL-LEUCINYL]-ALANINE ETHYL ESTER; N-HYDROXY-2-[4-(4-PHENOXY-BENZENESULFONYL)-TETRAHYDRO-PYRAN-4-YL]-ACETAMIDE	(M65)PID FRA PATHWAY; (M198)PID SYNDECAN 1 PATHWAY; (M8)PID ENDOTHELIN PATHWAY
HLA-DQA1	3117	major histocompatibility complex, class II, DQ alpha 1	Predicted intracellular proteins
NR1D1	9572	nuclear receptor subfamily 1 group D member 1	Nuclear receptors; Predicted intracellular proteins; Transcription factors:Zinc-coordinating DNA-binding domains	Nuclear bodies (Supported)	SR-9009; SR-9011	(M95)PID CIRCADIAN PATHWAY
ALDH5A1	7915	aldehyde dehydrogenase 5 family member A1	Predicted intracellular proteins; Potential drug targets; Enzymes; Disease related genes; ENZYME proteins:Oxidoreductases	Mitochondria (Supported)	Succinic acid; NADH; Valproic acid; Chlormerodrin
IL6	3569	interleukin 6	Predicted intracellular proteins; Disease related genes; Cancer-related genes:Candidate cancer biomarkers; FDA approved drug targets:Biotech drugs; Candidate cardiovascular disease genes; Predicted secreted proteins	Vesicles (Approved)	Ginseng; YSIL6; VX-702; Atiprimod; CRx-139; Andrographolide; Tapinarof; Siltuximab; Polaprezinc; Foreskin fibroblast (neonatal); Foreskin keratinocyte (neonatal); Binimetinib; Dilmapimod	(M9174)ST STAT3 PATHWAY; (M36)PID IL27 PATHWAY; (M65)PID FRA PATHWAY
HMGB2	3148	high mobility group box 2	Predicted intracellular proteins	Nucleoplasm (Supported); Additional: Nucleoli
SEMA3C	10512	semaphorin 3C	Predicted secreted proteins	Cytosol;Golgi apparatus (Approved); Additional: Plasma membrane		(M5880)NABA ECM AFFILIATED; (M5885)NABA MATRISOME ASSOCIATED; (M5889)NABA MATRISOME
SLC6A3	6531	solute carrier family 6 member 3	Transporters:Electrochemical Potential-driven transporters; FDA approved drug targets:Small molecule drugs; Disease related genes	Vesicles (Approved)	Amphetamine; Phentermine; Benzatropine; Venlafaxine; Loxapine; Methylphenidate; Meperidine; Imipramine; Duloxetine; Amoxapine; Mazindol; Procaine; Trimipramine; Modafinil; Phenmetrazine; Pseudoephedrine; Benzphetamine; Cocaine; Diethylpropion; Dopamine; Sertraline; Sibutramine; Chlorpheniramine; Diphenylpyraline; Nefazodone; Bupropion; Chloroprocaine; Escitalopram; Aripiprazole; Ephedra sinica ro…	(M275)PID ALPHA SYNUCLEIN PATHWAY
SLC19A2	10560	solute carrier family 19 member 2	Transporters:Electrochemical Potential-driven transporters; Disease related genes; Potential drug targets	Cytosol (Approved)
GADD45B	4616	growth arrest and DNA damage inducible beta	Predicted intracellular proteins	Nucleoplasm (Approved); Additional: Cytosol		(M20)PID P38 MKK3 6PATHWAY; (M54)PID IL12 2PATHWAY
DUSP8	1850	dual specificity phosphatase 8	Enzymes; Predicted intracellular proteins; ENZYME proteins:Hydrolases	Cytosol (Approved)		(M76)PID P38 ALPHA BETA PATHWAY; (M3721)ST JNK MAPK PATHWAY; (M166)PID ATF2 PATHWAY
MMP9	4318	matrix metallopeptidase 9	FDA approved drug targets:Small molecule drugs; ENZYME proteins:Hydrolases; Enzymes; Peptidases:Metallopeptidases; Disease related genes; Cancer-related genes:Candidate cancer biomarkers; Candidate cardiovascular disease genes; Predicted secreted proteins	Cytosol (Approved)	Glutathione; Marimastat; Minocycline; Captopril; Glucosamine; Zinc; 2-Amino-N,3,3-Trimethylbutanamide; 2-{[Formyl(Hydroxy)Amino]Methyl}-4-Methylpentanoic Acid; AE-941; PG-530742; Endostatin; 5-(4-PHENOXYPHENYL)-5-(4-PYRIMIDIN-2-YLPIPERAZIN-1-YL)PYRIMIDINE-2,4,6(2H,3H)-TRIONE; (2R)-2-AMINO-3,3,3-TRIFLUORO-N-HYDROXY-2-{[(4-PHENOXYPHENYL)SULFONYL]METHYL}PROPANAMIDE; (3R)-4,4-DIFLUORO-3-[(4-METHOXYPH…	(M63)PID AVB3 OPN PATHWAY; (M165)PID SYNDECAN 4 PATHWAY; (M65)PID FRA PATHWAY
PTPRC	5788	protein tyrosine phosphatase receptor type C	Predicted intracellular proteins; Cancer-related genes	Nucleoplasm;Vesicles (Uncertain)		(M1315)SIG PIP3 SIGNALING IN B LYMPHOCYTES; (M9526)ST T CELL SIGNAL TRANSDUCTION; (M8626)SIG BCR SIGNALING PATHWAY

## Sheet: Table S2 DEGs in GSE1919
Table S2. The differentially expressed genes in GSE1919 use limma package.
Gene	logFC	AveExpr	t	P.Value	adj.P.Val	B
DDIT4	-3.17969	7.54231	-14.8133	1.52823e-08	0.000138839	9.21864
MMP3	3.83197	7.89764	11.7099	1.70408e-07	0.000774077	7.40331
FASN	-3.2558	8.48966	-10.473	5.22456e-07	0.00158217	6.48288
ITPKC	-2.28431	4.84122	-10.1591	7.06664e-07	0.00160501	6.2274
MAFF	-2.73188	7.80733	-9.11112	2.05369e-06	0.00373155	5.30227
GADD45A	-2.07303	7.68375	-8.82779	2.78659e-06	0.00387072	5.0316
ADH1A	-2.52188	7.6199	-8.42888	4.33884e-06	0.00387072	4.6345
H1FX	-1.32722	9.57287	-8.42689	4.34861e-06	0.00387072	4.63247
TNFRSF11A	2.01725	3.3765	8.39573	4.50466e-06	0.00387072	4.60064
APOD	-4.7345	8.12197	-8.35905	4.69617e-06	0.00387072	4.56301
HSPA1A	-2.08052	9.22212	-8.18914	5.70551e-06	0.00387072	4.38648
TRIM14	1.98153	6.53151	8.16413	5.87286e-06	0.00387072	4.36019
SLC2A3	-2.54009	8.26143	-8.14634	5.99514e-06	0.00387072	4.34144
GPD1	-2.78975	7.63446	-8.13967	6.04171e-06	0.00387072	4.33439
C10orf10	-2.81267	9.45252	-8.04744	6.72687e-06	0.00387072	4.23645
MAOA	-2.02803	7.36645	-8.03054	6.8613e-06	0.00387072	4.21839
FADS1	-1.48008	7.18067	-7.98443	7.24295e-06	0.00387072	4.16891
IGHG1	3.36997	7.19508	7.76316	9.4218e-06	0.00475539	3.92759
TF	-2.42515	5.3579	-7.5842	1.17015e-05	0.00559519	3.72762
SCRG1	2.82581	5.23663	7.53912	1.23651e-05	0.00561682	3.67656
VEGFA	-2.34328	6.85816	-7.45074	1.37865e-05	0.00579781	3.57565
IGK	3.8555	8.21926	7.43603	1.40398e-05	0.00579781	3.55874
HIST1H1C	-1.82327	4.22412	-7.31092	1.6407e-05	0.0064559	3.41377
HDC	2.26312	2.99643	7.26131	1.74617e-05	0.0064559	3.35567
MT1X	-2.13226	10.5887	-7.24763	1.77653e-05	0.0064559	3.33959
TSC22D3	-1.37141	9.42359	-7.11423	2.10405e-05	0.00714979	3.18136
ADM	-2.42863	8.93033	-7.04688	2.29356e-05	0.00714979	3.10051
FABP4	-1.76507	9.92924	-7.04268	2.306e-05	0.00714979	3.09544
SERPINA3	-2.03582	7.57789	-7.00867	2.4092e-05	0.00714979	3.05434
CYP4B1	-1.64245	6.94298	-6.99979	2.43696e-05	0.00714979	3.04358
ADH1B	-2.68006	6.32691	-6.99893	2.43966e-05	0.00714979	3.04253
ACSL1	-1.5598	7.07318	-6.75359	3.36101e-05	0.00953206	2.74067
IGHM	4.35951	7.39208	6.72644	3.48395e-05	0.00953206	2.7067
INSIG1	-1.5459	6.36999	-6.70861	3.56731e-05	0.00953206	2.68434
SDC4	-1.77235	7.4616	-6.66517	3.77944e-05	0.00968326	2.62967
ADIPOQ	-2.1554	7.56354	-6.65382	3.83707e-05	0.00968326	2.61534
NPR1	-1.24104	5.85769	-6.54083	4.465e-05	0.0109634	2.47161
SCN2B	2.04058	3.01901	6.50384	4.69382e-05	0.0112219	2.42413
SOCS1	-2.13011	3.41275	-6.46977	4.91573e-05	0.0114511	2.38021
ADH1C	-2.98038	5.74166	-6.41505	5.29601e-05	0.0118139	2.30931
PPAP2B	-1.14131	10.1177	-6.40326	5.38199e-05	0.0118139	2.29397
BCL6	-1.34132	6.30066	-6.38922	5.48637e-05	0.0118139	2.27567
MTHFD2	-1.76935	8.20377	-6.3602	5.70894e-05	0.0118139	2.23777
ADCY1	1.64435	4.15256	6.35858	5.72165e-05	0.0118139	2.23565
PLIN2	-1.66847	7.90539	-6.27907	6.3842e-05	0.012889	2.13111
IGLC1	4.04341	8.2794	6.12374	7.92734e-05	0.0156565	1.92406
EGR2	2.05019	5.98813	6.07313	8.51272e-05	0.0157485	1.85578
RHOB	-2.04691	9.02286	-6.06851	8.56839e-05	0.0157485	1.84953
KLF9	-1.64585	9.19466	-6.06229	8.64399e-05	0.0157485	1.84111
CD52	2.29083	6.46845	6.0145	9.24914e-05	0.0157485	1.77618
RABL3	1.44964	3.81209	6.0078	9.33759e-05	0.0157485	1.76705
GLRX	-1.16116	7.87906	-6.00719	9.3457e-05	0.0157485	1.76621
CALB2	-1.43016	6.48005	-5.991	9.56321e-05	0.0157485	1.74412
INHBB	-1.89983	6.92206	-5.98879	9.59329e-05	0.0157485	1.74111
TIMP4	-2.32837	7.7503	-5.94094	0.000102708	0.0157485	1.67554
ATF3	-1.89654	6.26681	-5.93852	0.000103064	0.0157485	1.67222
SCD	-2.94544	6.19894	-5.93321	0.000103849	0.0157485	1.66492
CDC42EP4	-2.00098	7.94641	-5.91601	0.000106438	0.0157485	1.64125
HSPA6	-1.92693	7.04375	-5.90528	0.000108087	0.0157485	1.62646
NFIL3	-1.84027	8.44671	-5.90063	0.000108811	0.0157485	1.62004
MAP1B	-1.23388	4.33572	-5.88874	0.000110684	0.0157485	1.60361
RGS19	1.01903	7.61631	5.8779	0.000112422	0.0157485	1.58863
ZBTB16	-2.36232	7.88874	-5.87624	0.000112692	0.0157485	1.58632
CORO1A	1.34451	7.03913	5.87092	0.000113558	0.0157485	1.57895
SIK1	-1.93065	7.17053	-5.86366	0.00011475	0.0157485	1.5689
AOX1	-1.72156	5.91442	-5.85575	0.000116065	0.0157485	1.55793
STC1	-3.47354	3.98451	-5.85529	0.000116142	0.0157485	1.55729
CEBPD	-1.35834	9.87548	-5.82664	0.000121045	0.016172	1.51748
PPP1R15A	-1.624	9.27215	-5.78305	0.000128932	0.0167336	1.45665
KDELR3	1.41643	6.29983	5.75107	0.000135066	0.0172342	1.41184
SEMA5A	1.41251	8.10776	5.7434	0.000136583	0.0172342	1.40107
ETS2	-1.27994	6.77953	-5.71384	0.000142602	0.0175754	1.35946
ZFHX2	-1.33828	2.9195	-5.71118	0.000143157	0.0175754	1.35572
GALNT10	1.20661	6.26423	5.69917	0.000145694	0.0175954	1.33876
FSTL3	-2.30522	6.25693	-5.68601	0.000148527	0.0175954	1.32017
CXCL10	2.94324	2.36633	5.68324	0.00014913	0.0175954	1.31626
TNFAIP3	-1.74611	7.88571	-5.64335	0.000158125	0.0184044	1.25969
IGH	2.85824	8.03605	5.63517	0.000160038	0.0184044	1.24807
ZFP36L2	-1.33662	9.88519	-5.58592	0.000172101	0.0195442	1.17783
FAM107A	-1.32428	7.57949	-5.54219	0.000183622	0.0205952	1.11514
CDO1	-1.87864	7.24277	-5.51483	0.000191249	0.0211889	1.07576
CRYAB	-1.04654	9.35992	-5.44915	0.000210961	0.0228164	0.980744
CHI3L1	-1.55089	9.60258	-5.43723	0.000214764	0.0229544	0.963431
CYB5A	-1.1587	7.51689	-5.41977	0.000220465	0.0232898	0.938035
PDZRN3	-1.81159	4.0648	-5.40737	0.000224613	0.0234553	0.919963
SLC39A14	-1.04848	9.94417	-5.37243	0.000236754	0.0238368	0.868907
RRAD	-2.39461	6.20011	-5.37223	0.000236827	0.0238368	0.868608
C6	-1.22494	6.06755	-5.36252	0.000240325	0.0238368	0.854384
CLDN5	-1.51163	7.86385	-5.3596	0.000241385	0.0238368	0.850114
CDH11	1.6091	6.35397	5.34358	0.000247306	0.0241589	0.8266
DUSP4	-2.3664	5.57093	-5.30068	0.000263926	0.0255082	0.763463
SLC6A3	-3.91401	4.0714	-5.29217	0.000267364	0.0255684	0.750897
LMOD1	-1.38525	7.14389	-5.28528	0.000270177	0.0255684	0.740729
DYRK3	-1.40602	5.10378	-5.27449	0.000274652	0.025646	0.724776
RBPMS	-1.00302	6.20311	-5.26975	0.000276643	0.025646	0.717758
AOC3	-1.39867	6.75829	-5.24352	0.000287936	0.0263523	0.678887
P2RY6	1.87363	4.5346	5.2387	0.000290064	0.0263523	0.671733
PIM1	-1.16842	8.6781	-5.21516	0.000300703	0.0270484	0.636721
ABCC3	1.2756	6.43178	5.19694	0.000309219	0.0275417	0.609574
NAMPT	-1.57503	5.78242	-5.18774	0.000313613	0.0276619	0.595853
CSN1S1	2.84962	7.45044	5.15672	0.000328934	0.0287343	0.549464
ORAI2	1.82515	4.70483	5.1299	0.000342823	0.0296624	0.509228
MMP1	3.35313	6.05832	5.12356	0.000346194	0.0296714	0.499707
RAD51B	2.2808	0.912299	5.10835	0.000354429	0.0299162	0.476829
MRC2	1.19517	9.54929	5.10233	0.000357744	0.0299162	0.467768
ATF6B	1.18143	3.90175	5.10019	0.000358929	0.0299162	0.464549
GADD45B	-1.47697	7.94128	-5.0862	0.000366794	0.0301896	0.443448
GPC3	-1.5734	5.4243	-5.08258	0.000368855	0.0301896	0.437993
DUSP5	-1.34611	5.98899	-5.07435	0.000373598	0.0303048	0.425553
ATF4	-1.22902	9.16564	-5.01808	0.000407767	0.0324962	0.340318
SRPX	-1.4093	8.11873	-5.0075	0.000414555	0.0327498	0.324233
ZFAND5	-1.24759	7.33195	-5.0001	0.000419376	0.0328451	0.312967
FOXO3	-1.46127	8.64573	-4.98562	0.000428977	0.0333099	0.290909
CD27	3.36391	3.50515	4.97625	0.000435314	0.0335155	0.276618
ITCH	-1.47735	2.8312	-4.95964	0.000446787	0.0341097	0.251261
SLC7A5	-1.59486	5.89207	-4.94402	0.000457872	0.0343783	0.227368
TRIL	1.62616	4.54965	4.92717	0.000470153	0.0347263	0.201561
RAB6B	1.48115	3.65282	4.89664	0.000493305	0.0361426	0.15468
STMN2	2.20944	3.86778	4.87458	0.000510781	0.0371236	0.12072
ZWINT	1.09474	5.35702	4.86812	0.00051603	0.037132	0.110747
ITGA5	-1.02548	7.88525	-4.86322	0.000520038	0.037132	0.103198
XYLT1	1.34245	5.89738	4.84006	0.00053946	0.0374424	0.0674202
MXI1	-1.01495	7.72237	-4.8397	0.000539764	0.0374424	0.0668692
XYLB	-1.55019	1.72889	-4.8364	0.000542594	0.0374424	0.0617659
FBLN2	-1.32324	8.1899	-4.82234	0.000554838	0.0375896	0.0399877
AGTR1	-1.45641	6.57021	-4.81252	0.000563557	0.0375896	0.0247685
HCG26	2.00918	3.60804	4.80924	0.000566502	0.0375896	0.0196817
RAC2	1.28017	6.21443	4.80706	0.000568464	0.0375896	0.0163067
FAM65B	-1.62668	3.93185	-4.80399	0.000571246	0.0375896	0.011542
NID2	1.93984	6.94492	4.79974	0.000575119	0.0375896	0.00494488
CDKN1A	-1.43819	9.4954	-4.76815	0.000604793	0.0385734	-0.0441721
IL1B	-1.78547	6.54905	-4.75952	0.000613179	0.0386857	-0.0576196
MMP7	-2.00308	2.14072	-4.74606	0.000626502	0.039251	-0.0786098
ACKR1	-1.13993	9.29985	-4.7418	0.000630781	0.039251	-0.0852566
SPRY1	-1.19107	7.90693	-4.73522	0.000637446	0.0393959	-0.0955226
HSPB6	-2.21893	4.92953	-4.7131	0.000660429	0.0405405	-0.130119
MT2A	-1.61485	9.30519	-4.68455	0.000691381	0.0419307	-0.174863
MIR6883	-1.34935	8.16481	-4.68372	0.000692307	0.0419307	-0.176171
CD79A	2.06762	4.72223	4.65642	0.000723386	0.0432157	-0.219078
ASPA	2.04786	2.63918	4.65264	0.000727793	0.0432157	-0.225014
PRKAR2B	-1.3783	4.36255	-4.64703	0.000734412	0.0433255	-0.233862
CNR1	-1.7992	3.43578	-4.63686	0.00074655	0.0437574	-0.249881
LAMA2	-1.80119	5.7078	-4.63238	0.000751966	0.0437924	-0.256946
SLC6A10P	-1.38364	6.975	-4.61324	0.000775569	0.0445952	-0.287153
GBE1	-1.27235	8.19625	-4.57978	0.000818732	0.046496	-0.340096
TAC1	3.3671	1.77014	4.57968	0.000818862	0.046496	-0.340251
C14orf132	1.19677	7.76816	4.56945	0.000832567	0.0469805	-0.356478
KLF4	-1.37919	8.46222	-4.56266	0.000841782	0.0472073	-0.36724
PPARG	-1.12131	5.76917	-4.55789	0.000848324	0.0472824	-0.374809
NIPSNAP1	1.16735	6.44173	4.5292	0.000888842	0.0487795	-0.42043
RP11-79P5.2	-1.43234	2.64848	-4.5275	0.000891293	0.0487795	-0.423123
COL8A1	1.14995	4.22732	4.47751	0.000967029	0.0517677	-0.502881
GTF2A1	-1.24759	2.34041	-4.47048	0.00097821	0.0517677	-0.514126
FOSL2	-1.07909	7.97267	-4.46932	0.000980082	0.0517677	-0.515996
KLF6	-1.01174	9.76595	-4.45367	0.0010055	0.051797	-0.541042
NELL1	2.9541	3.33561	4.45182	0.00100856	0.051797	-0.544015
IGJ	4.33588	4.28779	4.44307	0.00102313	0.051797	-0.558041
IGHV5-78	1.28704	2.36991	4.43767	0.00103223	0.051797	-0.566702
WNT5A	1.28049	2.73583	4.43641	0.00103436	0.051797	-0.568724
AQP3	1.26068	6.08209	4.43381	0.00103878	0.051797	-0.572893
PCK1	-1.90853	6.88411	-4.43128	0.00104311	0.051797	-0.576961
AVPR1A	-2.1622	1.20122	-4.42945	0.00104625	0.051797	-0.579899
SCG2	1.50655	4.48377	4.42279	0.00105775	0.051797	-0.590593
SPIB	1.1437	6.65704	4.42222	0.00105873	0.051797	-0.5915
LRRC15	2.79307	6.2271	4.41876	0.00106477	0.051797	-0.597064
PIGA	-1.30124	5.37671	-4.41797	0.00106616	0.051797	-0.59834
SPRY2	-1.16713	5.74181	-4.4124	0.00107595	0.0518543	-0.607289
AZGP1	-2.63735	2.40607	-4.40495	0.00108922	0.0520817	-0.619273
GAMT	1.24062	4.07744	4.38454	0.00112643	0.0531425	-0.652137
PTX3	-2.78042	4.71474	-4.38318	0.00112895	0.0531425	-0.654326
WASF3	-1.36019	6.15574	-4.37399	0.00114617	0.0536752	-0.669142
LDLR	-1.91939	6.01127	-4.35958	0.00117375	0.0546846	-0.6924
FANCC	1.18473	6.47328	4.34738	0.00119763	0.0555127	-0.712111
AP1S1	1.9392	4.66601	4.32515	0.00124249	0.0563544	-0.748088
CD4	1.26503	6.20503	4.32305	0.00124681	0.0563544	-0.751484
VEGFC	2.57098	5.92966	4.30467	0.00128536	0.0576932	-0.781283
ACLY	-1.07884	8.48223	-4.29701	0.00130178	0.0576932	-0.793704
ALOX5	1.06566	6.01487	4.2893	0.00131853	0.0581499	-0.806217
SSPN	1.36863	5.69341	4.26979	0.00136196	0.0585263	-0.83793
GPR1	2.64596	7.08457	4.25933	0.00138586	0.0585263	-0.85495
IL1R2	-1.98925	4.59009	-4.2569	0.00139149	0.0585263	-0.858917
GABRB1	2.80484	4.22713	4.24777	0.00141279	0.0591185	-0.873784
ME2	1.42716	5.76867	4.24051	0.00142998	0.0591185	-0.885615
BLNK	1.47612	5.3972	4.23113	0.0014525	0.0591185	-0.90091
SYCP1	2.2163	1.06902	4.22866	0.0014585	0.0591185	-0.904942
FOSB	-1.10765	10.0717	-4.22785	0.00146046	0.0591185	-0.90626
PTPRCAP	1.73615	4.61795	4.22635	0.00146413	0.0591185	-0.908716
NREP	1.47474	6.72397	4.21175	0.00150023	0.060308	-0.93255
TBC1D31	2.37799	0.984808	4.18638	0.00156522	0.0626432	-0.974047
PLA2G15	1.46201	6.16882	4.17864	0.00158562	0.06291	-0.98672
TYMS	1.12157	4.77845	4.17812	0.00158702	0.06291	-0.987584
HMGB2	-1.1216	7.48243	-4.1739	0.00159826	0.06291	-0.994492
C22orf31	2.0118	3.0347	4.17108	0.00160582	0.06291	-0.999108
CORO2A	-1.48515	2.70503	-4.16236	0.00162947	0.06291	-1.01341
PTGDS	1.62492	10.1704	4.16062	0.00163421	0.06291	-1.01625
MDK	1.5381	6.4978	4.155	0.0016497	0.0631729	-1.02549
PTN	1.52743	5.61649	4.13566	0.00170411	0.0645078	-1.05724
GZMA	1.9779	4.2507	4.12681	0.00172963	0.0651939	-1.07179
ICOS	1.57931	2.95432	4.12442	0.00173659	0.0651939	-1.07572
AFM	1.52512	-0.525385	4.12046	0.00174819	0.0653594	-1.08223
KAZALD1	1.66819	5.04967	4.11144	0.00177492	0.0660865	-1.09708
HLA-DMB	1.17235	10.0596	4.09264	0.00183198	0.0673828	-1.12804
IRF8	1.03399	6.75749	4.08073	0.00186911	0.0675881	-1.14767
RARRES3	1.2415	7.69762	4.07804	0.00187762	0.0675881	-1.15212
ADAM8	1.07961	5.81895	4.0638	0.00192327	0.0675881	-1.17562
HEBP2	-1.26501	8.6054	-4.06293	0.0019261	0.0675881	-1.17706
CXCL2	-1.65422	7.84624	-4.06154	0.00193065	0.0675881	-1.17937
CPA3	1.88113	5.54866	4.06114	0.00193195	0.0675881	-1.18002
APOBEC3G	1.21146	4.80029	4.05666	0.0019466	0.0675881	-1.18742
PSD3	1.35388	6.41846	4.04362	0.00198998	0.0684808	-1.20898
LCK	1.02779	4.83482	4.03905	0.0020054	0.0687513	-1.21653
ALDH1L1	-1.25404	5.32344	-4.0344	0.00202125	0.0690341	-1.22423
AGPAT2	-1.08827	8.58714	-4.02818	0.00204262	0.0695026	-1.23452
ABL2	-2.05772	2.50655	-4.02597	0.00205027	0.0695026	-1.23818
MXRA5	1.87762	8.52439	4.02239	0.00206275	0.0696659	-1.24412
MBTPS2	1.88867	3.18047	4.01906	0.00207442	0.0698003	-1.24963
REPS2	2.03664	3.07515	4.01623	0.00208437	0.0698764	-1.25432
SERPINE1	-1.50337	6.98615	-4.01372	0.00209328	0.069917	-1.25849
NPAS2	-1.10213	4.01941	-4.00742	0.00211573	0.0701512	-1.26893
DDIT3	-1.88954	7.50149	-4.00074	0.00213982	0.0704359	-1.28
CEMIP	1.75237	6.09979	3.98019	0.00221577	0.0722378	-1.31412
MGAT4C	2.33638	3.28634	3.96827	0.00226108	0.0733639	-1.33391
EPHA4	-1.4794	4.0054	-3.9629	0.00228182	0.0737736	-1.34285
ITGB2	1.0249	8.11916	3.94557	0.0023501	0.0757115	-1.37168
CFI	1.50103	7.02674	3.93484	0.00239342	0.0762956	-1.38954
SV2B	1.1482	6.79286	3.93202	0.00240493	0.0763944	-1.39423
BAI3	1.8176	2.15913	3.92525	0.00243284	0.0769701	-1.40552
WIF1	1.11229	3.63498	3.92269	0.00244348	0.0769701	-1.40978
NKX2-5	1.23295	4.06629	3.91662	0.00246891	0.0772504	-1.41991
TRBC1	1.33867	6.17219	3.91492	0.00247607	0.0772504	-1.42274
LST1	1.20629	8.92621	3.91331	0.0024829	0.0772504	-1.42543
AMPH	-2.19729	4.63738	-3.90931	0.00249987	0.0775131	-1.43209
FLRT2	1.60368	5.35552	3.90149	0.00253348	0.0779903	-1.44515
PRUNE2	1.30521	5.96765	3.89858	0.00254611	0.0779903	-1.45001
LILRB4	1.05775	8.23099	3.86822	0.00268171	0.080407	-1.50074
DUSP2	-1.4103	5.19269	-3.85322	0.00275144	0.0818411	-1.52583
FCGR1A	1.30174	6.70244	3.85271	0.00275384	0.0818411	-1.52668
MNDA	1.4479	6.00781	3.85213	0.00275656	0.0818411	-1.52765
CDH2	1.06825	4.30229	3.84764	0.00277789	0.0822057	-1.53518
CYP27B1	-1.47996	2.17499	-3.8443	0.00279379	0.0824077	-1.54076
TLE3	-1.10988	4.40833	-3.83762	0.002826	0.0828201	-1.55197
LIPE	-1.23668	7.41027	-3.8355	0.00283626	0.0828535	-1.55551
SLC25A20	1.12137	5.27292	3.8299	0.00286363	0.0833848	-1.56489
STAT1	1.00724	6.65875	3.81905	0.00291745	0.0843935	-1.58309
CXCL8	-1.16224	6.84965	-3.81714	0.00292703	0.0843935	-1.58629
RIMS3	1.63011	4.05462	3.81589	0.0029333	0.0843935	-1.58838
ZNF135	1.56877	2.69708	3.8143	0.00294134	0.0843935	-1.59106
CDKN2A	1.52472	2.84238	3.80862	0.00297017	0.0844069	-1.60059
ICAM1	-1.13464	6.60554	-3.80741	0.00297635	0.0844069	-1.60262
FADS2	-1.33571	6.539	-3.80729	0.00297695	0.0844069	-1.60282
G0S2	-1.38053	9.26245	-3.80445	0.0029915	0.0844069	-1.60758
PLIN1	-1.56781	8.92991	-3.80443	0.00299164	0.0844069	-1.60763
BMP5	-1.67945	2.18867	-3.7991	0.00301913	0.0846785	-1.61656
P2RY14	-1.80788	3.51738	-3.77767	0.00313247	0.0875646	-1.65257
CCL20	-3.04684	2.93173	-3.76844	0.00318265	0.0883133	-1.66809
CLK1	-1.33302	6.24232	-3.76841	0.00318278	0.0883133	-1.66813
KIF11	2.15432	2.2581	3.76318	0.00321156	0.0883133	-1.67693
ANGPTL7	-1.994	4.20887	-3.76315	0.00321173	0.0883133	-1.67698
LBP	-1.36945	7.74155	-3.7621	0.00321758	0.0883133	-1.67875
TCHH	1.79596	2.79495	3.75978	0.00323045	0.0883994	-1.68265
COL1A2	1.30087	8.54271	3.75094	0.00328005	0.0892193	-1.69753
AJ004954	2.83014	3.72046	3.74205	0.00333066	0.0903255	-1.71249
HK3	1.02419	7.09074	3.73886	0.00334904	0.0905538	-1.71786
MARCKS	1.18275	7.33598	3.72856	0.00340914	0.0916823	-1.73523
CETN2	1.16448	6.9628	3.72667	0.00342025	0.0916823	-1.73841
SLC23A2	1.16802	6.16118	3.72653	0.00342106	0.0916823	-1.73864
B3GALT2	-1.37862	-0.489771	-3.72304	0.00344177	0.0917732	-1.74453
CCL14	-1.10028	8.47828	-3.7048	0.00355193	0.0924934	-1.77529
ANXA13	-1.36319	2.70417	-3.70164	0.00357136	0.0924934	-1.78062
TGM2	-1.01533	6.67458	-3.68986	0.00364485	0.0927548	-1.8005
OLFML1	1.45254	5.57703	3.68755	0.00365943	0.0928658	-1.8044
KAL1	1.44337	5.37037	3.68315	0.00368741	0.0933152	-1.81183
TNFSF11	2.4935	3.19982	3.67043	0.00376947	0.0946013	-1.83331
MYC	-1.02834	8.20312	-3.66347	0.0038152	0.0949618	-1.84508
IFRD1	-1.16696	5.12072	-3.66135	0.00382928	0.095046	-1.84867
CIT	1.63815	4.54351	3.65981	0.0038395	0.095046	-1.85128
NID1	-1.18479	6.40883	-3.65702	0.00385809	0.0952467	-1.85599
SORL1	1.49071	7.05498	3.64575	0.00393423	0.0966013	-1.87506
CX3CR1	2.8617	5.10732	3.6407	0.00396885	0.0971886	-1.8836
PTHLH	1.32661	4.00534	3.62517	0.00407726	0.0988846	-1.90989
GPR116	-1.06729	7.44534	-3.61747	0.00413209	0.0993831	-1.92292
LTC4S	1.03796	7.14853	3.61138	0.00417606	0.0994125	-1.93324
MN1	1.27738	6.37509	3.61127	0.00417682	0.0994125	-1.93342
NUPL1	-2.15133	1.67398	-3.61113	0.00417783	0.0994125	-1.93366
TNP2	-1.35238	1.3927	-3.61083	0.00418003	0.0994125	-1.93417
MYOC	-1.91812	5.81269	-3.60537	0.00421987	0.100098	-1.94342
CD48	1.33633	4.6937	3.60132	0.00424973	0.100481	-1.9503
GUSBP11	1.47742	8.17503	3.597	0.00428173	0.100516	-1.95761
RARRES2	-1.19289	7.45535	-3.58995	0.00433455	0.100948	-1.96956
CPSF6	-1.35489	2.18223	-3.58962	0.00433704	0.100948	-1.97012
OLR1	2.13078	5.65668	3.58569	0.0043668	0.100948	-1.97679
HP	-1.48198	4.32294	-3.57515	0.00444765	0.102296	-1.99468
SELL	1.86988	4.75952	3.57224	0.00447023	0.102522	-1.99961
FKBP5	-1.39998	7.60914	-3.56903	0.00449528	0.102522	-2.00506
CSRP2	-1.6042	5.16074	-3.56749	0.00450735	0.102522	-2.00767
TK1	1.01252	5.2782	3.53893	0.00473733	0.105937	-2.05617
AFP	1.58376	0.858854	3.53542	0.00476643	0.105937	-2.06213
MTUS2	1.62854	5.41733	3.53509	0.00476922	0.105937	-2.0627
DHX57	1.07466	2.77324	3.52405	0.00486192	0.10695	-2.08146
SLC19A2	-1.19746	2.72025	-3.51856	0.00490876	0.107027	-2.0908
PLK2	-1.32316	5.46261	-3.51812	0.00491252	0.107027	-2.09154
PLXNC1	1.7131	5.73573	3.51453	0.00494339	0.107288	-2.09764
PROM1	1.33995	2.18791	3.51187	0.00496638	0.107288	-2.10216
CDON	2.04604	4.37887	3.50747	0.00500477	0.10749	-2.10966
PLXNB1	-1.32425	5.03787	-3.49072	0.0051534	0.10925	-2.13816
GALNT18	1.26419	4.52899	3.49011	0.00515888	0.10925	-2.13919
CYLC1	-1.91882	2.19698	-3.48542	0.00520131	0.109893	-2.14717
CHRDL1	-1.44395	4.78775	-3.47638	0.00528419	0.110615	-2.16255
IGFBP6	-1.03928	8.92444	-3.47411	0.00530527	0.110801	-2.16643
EFNA1	-1.22609	5.58497	-3.47045	0.00533936	0.111003	-2.17266
HEXB	-1.95322	2.42892	-3.45705	0.00546606	0.112936	-2.19549
GP5	1.51135	1.57364	3.45308	0.00550421	0.11303	-2.20226
VPS41	2.17342	1.47027	3.45232	0.00551154	0.11303	-2.20355
AC012065.7	1.46155	2.60975	3.44941	0.00553963	0.113319	-2.2085
WHAMM	-1.91916	2.73076	-3.44829	0.00555057	0.113319	-2.21042
PLEK	1.03405	6.28351	3.43217	0.00570956	0.115358	-2.23789
MFAP4	1.07931	7.57931	3.42524	0.00577937	0.115906	-2.24971
LPL	-1.24343	8.21029	-3.41195	0.00591558	0.117343	-2.27236
CITED1	-1.14719	3.47912	-3.40719	0.00596528	0.118043	-2.2805
TJP2	-1.7789	4.02093	-3.40162	0.00602386	0.118365	-2.29
CCL15	-1.16279	3.2774	-3.39959	0.0060453	0.118365	-2.29345
DHFR	1.18273	3.84518	3.39187	0.00612787	0.118957	-2.30664
GDF15	-1.38155	7.21982	-3.37918	0.00626591	0.119864	-2.32829
KIAA0101	2.61357	3.81128	3.37533	0.00630845	0.119864	-2.33486
CCNB1	1.02066	3.25973	3.37231	0.00634204	0.119864	-2.34002
GAL	-1.67762	4.27584	-3.37101	0.00635651	0.119864	-2.34224
ADAMTSL3	1.16016	6.54303	3.36865	0.00638294	0.119864	-2.34627
LAS1L	-1.08021	6.31829	-3.36644	0.00640775	0.11996	-2.35004
2021-03-03	-2.03719	2.03239	-3.35679	0.00651742	0.121583	-2.36653
ANKRD7	-1.57491	1.88409	-3.35528	0.00653475	0.121601	-2.3691
TTC3	1.10983	6.42604	3.35312	0.00655958	0.12162	-2.37279
SEL1L3	1.30528	4.77556	3.34718	0.00662852	0.122142	-2.38294
TBKBP1	-1.45272	5.17113	-3.34607	0.00664149	0.122142	-2.38484
SHANK2	1.16133	4.07823	3.34466	0.00665797	0.122197	-2.38725
DDO	1.63712	2.25932	3.33231	0.00680426	0.123141	-2.40835
FCGR3B	1.97452	7.87471	3.32567	0.00688427	0.123856	-2.4197
SEMA3C	1.33262	7.83986	3.32358	0.00690961	0.124059	-2.42327
CHST2	1.09061	7.15025	3.31281	0.00704185	0.125395	-2.44167
APOA1	1.05331	1.70961	3.31191	0.00705306	0.125395	-2.44321
FUT9	1.57001	1.41609	3.3078	0.00710429	0.126059	-2.45023
SLC27A2	1.30318	1.64401	3.30202	0.00717701	0.127102	-2.46012
ITGA7	-1.06078	8.83935	-3.29913	0.00721371	0.127255	-2.46506
LRRC32	-1.05124	7.42172	-3.29524	0.00726327	0.127649	-2.47171
TM4SF4	-1.43951	1.33828	-3.29518	0.0072641	0.127649	-2.47182
BRINP1	1.74777	2.90334	3.29184	0.00730695	0.127829	-2.47752
HBA1	1.79627	9.82619	3.28953	0.00733676	0.127829	-2.48147
ATP5B	1.05502	4.42313	3.28626	0.00737925	0.12794	-2.48707
ADAMTS3	1.00928	4.17864	3.26266	0.00769284	0.131975	-2.52743
PHKB	1.18948	5.80115	3.25648	0.00777727	0.132813	-2.53801
ADORA3	1.24235	6.30372	3.24776	0.00789784	0.133616	-2.55292
LONRF1	-1.01129	5.74086	-3.23839	0.00802967	0.135092	-2.56896
PSMB9	1.04461	8.43233	3.223	0.00825087	0.136896	-2.59529
DHODH	-1.07305	3.85551	-3.22265	0.00825607	0.136896	-2.5959
HLA-DOB	1.06018	4.91916	3.22215	0.00826326	0.136896	-2.59674
RP11-116O18.1	-2.39915	1.28364	-3.2173	0.00833449	0.137638	-2.60506
IGLJ3	2.23622	6.3254	3.21534	0.0083633	0.137646	-2.6084
ATP1A1	-1.04907	4.50613	-3.21203	0.00841246	0.137707	-2.61407
ANK3	1.37945	6.1698	3.20343	0.00854122	0.138566	-2.62878
ALG13	2.06159	1.83708	3.19458	0.00867604	0.140502	-2.64394
BMPR2	-1.4584	2.50379	-3.18805	0.0087767	0.141377	-2.65511
GINS1	2.10377	2.12975	3.17708	0.00894874	0.143365	-2.67389
AOC2	-1.05149	5.11264	-3.17319	0.00901061	0.143365	-2.68055
CHD1L	1.71485	1.61241	3.16894	0.00907863	0.143442	-2.68783
LEPR	1.22094	1.96854	3.16355	0.00916568	0.144066	-2.69706
ASIP	1.19291	3.71885	3.14781	0.00942453	0.147276	-2.72399
SYNE2	-1.04488	4.09506	-3.14721	0.00943457	0.147276	-2.72502
ATP4B	1.31438	3.02253	3.13608	0.00962235	0.149602	-2.74407
IL2RB	1.68997	3.7358	3.12656	0.00978604	0.150944	-2.76037
NIPAL3	1.45532	4.02901	3.11713	0.00995096	0.152651	-2.77651
TPX2	1.24599	4.31126	3.11359	0.0100136	0.153154	-2.78258
FOXM1	1.18147	3.72214	3.11006	0.0100764	0.153339	-2.78861
PIM2	1.02968	6.04286	3.09937	0.0102692	0.155306	-2.80691
LMAN1	1.5002	2.9991	3.09911	0.0102739	0.155306	-2.80736
SHC2	-1.38153	3.70365	-3.09035	0.0104347	0.157212	-2.82234
HBB	1.57707	10.5438	3.08186	0.0105929	0.158025	-2.83687
VCAM1	1.64506	8.28423	3.07404	0.010741	0.159448	-2.85027
S100A8	1.30721	8.81655	3.061	0.0109924	0.162457	-2.87258
CDR1	1.23876	2.42538	3.05712	0.0110682	0.163238	-2.87921
FPR3	1.54537	7.27665	3.05192	0.011171	0.16422	-2.88812
LUZP2	1.41122	0.721989	3.04892	0.0112305	0.164564	-2.89325
CTPS1	-1.45168	3.05127	-3.04347	0.0113398	0.164816	-2.90258
CELF2	-1.02795	5.58709	-3.02486	0.0117206	0.168751	-2.93441
IL2RG	1.0332	5.90036	3.02309	0.0117575	0.169014	-2.93744
SDC1	1.03467	7.09121	3.01035	0.0120264	0.171522	-2.95921
TYRO3	-1.26192	5.20161	-2.99898	0.0122718	0.172851	-2.97866
DOCK4	1.05037	5.9579	2.99341	0.0123938	0.173494	-2.98819
ZNF79	1.46092	3.66596	2.9889	0.0124935	0.174114	-2.9959
OSBPL3	2.19926	3.54679	2.97636	0.012775	0.176284	-3.01733
BTN3A3	1.07918	5.48363	2.96646	0.0130017	0.178429	-3.03424
NET1	1.80653	1.51964	2.96073	0.0131346	0.179821	-3.04403
TFR2	1.18141	4.81943	2.95864	0.0131836	0.179853	-3.0476
CYP2C18	1.04469	3.9622	2.95687	0.0132251	0.179853	-3.05062
VNN2	1.88791	3.27047	2.95443	0.0132826	0.180109	-3.0548
VGF	-1.08476	4.42029	-2.9327	0.0138057	0.184267	-3.09191
RSAD2	1.72952	3.65733	2.93243	0.0138124	0.184267	-3.09237
C1orf21	-1.75435	2.69324	-2.92773	0.0139281	0.184996	-3.10038
RBM38	-1.37568	4.21745	-2.9146	0.014257	0.18799	-3.12279
LIPA	1.20375	9.03322	2.91012	0.014371	0.18876	-3.13043
SERPINA5	-1.92386	3.52249	-2.90743	0.01444	0.188865	-3.13503
NOS1	1.203	3.12375	2.90604	0.0144757	0.188865	-3.1374
SH2D1A	-1.3554	0.758461	-2.90003	0.0146314	0.188865	-3.14766
SMR3B	1.07217	1.8289	2.89989	0.0146349	0.188865	-3.14789
LRRC17	2.21926	3.62008	2.89929	0.0146506	0.188865	-3.14892
CETP	-1.73422	2.50249	-2.89758	0.0146952	0.188865	-3.15183
CPVL	1.33148	7.49069	2.89691	0.0147126	0.188865	-3.15297
CCL19	2.54068	4.38306	2.88955	0.0149064	0.189053	-3.16552
KCNS3	1.04066	3.48503	2.8857	0.0150087	0.189053	-3.17208
USP9Y	-1.48069	2.09362	-2.88549	0.0150146	0.189053	-3.17245
SYT17	1.46698	4.69739	2.88512	0.0150243	0.189053	-3.17308
MMP9	1.70901	6.17986	2.87834	0.0152067	0.189879	-3.18464
GAP43	2.09448	5.39822	2.868	0.0154887	0.192061	-3.20225
SORBS1	-1.60687	2.30939	-2.86555	0.0155564	0.192061	-3.20643
KRT18	-1.72578	3.8623	-2.8654	0.0155604	0.192061	-3.20668
FAP	1.61202	6.38659	2.86156	0.0156671	0.192605	-3.21322
DUSP8	-1.02651	4.49708	-2.8422	0.0162159	0.196931	-3.24619
CYP2C19	1.28678	4.14727	2.83852	0.0163224	0.196931	-3.25246
FCGR3A	1.39822	9.32954	2.83488	0.0164284	0.197947	-3.25865
CD2BP2	-1.31278	4.52714	-2.83126	0.0165345	0.198699	-3.26481
CNTNAP2	1.31979	3.04344	2.80454	0.0173394	0.205115	-3.31026
SYN2	-1.41279	2.89813	-2.80016	0.017475	0.20645	-3.3177
MAPK11	-1.00155	4.69206	-2.79641	0.0175918	0.207359	-3.32407
MYF5	1.21354	1.14253	2.78715	0.0178837	0.210057	-3.33979
DNAJB5	-1.27866	5.28333	-2.78605	0.017919	0.210057	-3.34167
NDC80	1.99956	1.68136	2.78139	0.0180679	0.211529	-3.34957
CRISP2	-1.69547	-0.349966	-2.77747	0.0181943	0.212189	-3.35623
SLC2A4	-1.34345	2.62396	-2.77215	0.0183673	0.213269	-3.36526
CTH	-1.67078	2.85718	-2.76387	0.0186397	0.213867	-3.37931
TSN	1.39264	4.02836	2.76346	0.0186534	0.213867	-3.38001
PALM	-1.10903	6.99981	-2.76302	0.0186678	0.213867	-3.38075
RPS4Y1	-3.60196	7.23507	-2.75426	0.018961	0.216111	-3.39561
TLR3	1.55189	2.78843	2.74982	0.0191111	0.216111	-3.40313
PNPLA2	-1.12698	8.52186	-2.74649	0.0192247	0.216111	-3.40878
DDX3Y	-2.94855	5.11111	-2.74387	0.0193145	0.216111	-3.41322
PFKFB1	-1.54131	2.75863	-2.74384	0.0193156	0.216111	-3.41328
FDX1	1.75417	0.933274	2.74024	0.0194393	0.217086	-3.41936
SPTLC2	-1.38625	3.62203	-2.73992	0.0194505	0.217086	-3.41991
PTPRC	1.10617	6.3561	2.73701	0.0195516	0.217293	-3.42485
CKAP2	1.81461	6.91206	2.72831	0.0198561	0.218923	-3.43958
ADCY7	1.20492	6.53828	2.72362	0.0200224	0.219514	-3.44752
ACACB	-1.035	5.36227	-2.7186	0.0202016	0.219798	-3.456
HERC4	1.92782	2.31552	2.71306	0.0204016	0.220653	-3.46538
DPYD	1.04137	7.07219	2.71115	0.020471	0.220884	-3.46861
HLA-DRB4	1.27776	8.90572	2.71114	0.0204716	0.220884	-3.46864
SLC28A2	-1.21866	2.40237	-2.70791	0.0205891	0.221252	-3.47409
EPHA7	-1.63474	-1.04017	-2.70439	0.0207184	0.221548	-3.48005
CLMN	-1.44133	1.90605	-2.70178	0.0208149	0.221692	-3.48447
PARP4	1.23155	5.50352	2.69556	0.0210463	0.222507	-3.49498
KDM5D	-1.86165	4.54937	-2.69511	0.0210629	0.222507	-3.49573
CLDN10	-1.50299	1.81874	-2.6863	0.0213953	0.225436	-3.51062
AMPD1	1.39053	2.60735	2.68366	0.0214958	0.225704	-3.51508
MYL3	1.54392	4.22577	2.67792	0.021716	0.226264	-3.52476
KCNA3	1.32251	0.274872	2.67584	0.0217967	0.226264	-3.52829
MVD	-1.7462	3.56152	-2.67578	0.0217988	0.226264	-3.52838
SP110	1.2158	4.51124	2.67403	0.0218668	0.226264	-3.53134
HLA-DQA1	1.72732	7.56286	2.66991	0.0220274	0.227134	-3.53829
CHRFAM7A	1.64592	4.32282	2.66931	0.0220509	0.227134	-3.5393
FUT5	-1.27603	3.72659	-2.66718	0.0221344	0.227221	-3.54289
TTC30A	1.29023	1.29864	2.66604	0.0221793	0.227272	-3.54482
FIGF	-1.48702	2.99167	-2.66416	0.0222534	0.227671	-3.54799
SLC22A3	1.13905	3.0605	2.65937	0.0224437	0.228332	-3.55607
GABRR1	-1.51568	1.15911	-2.65632	0.0225656	0.229224	-3.56121
ST8SIA1	1.15004	2.29793	2.65591	0.0225817	0.229224	-3.56189
BIK	1.4465	2.62246	2.65147	0.0227605	0.230267	-3.56938
SCEL	1.68093	2.46167	2.64877	0.0228699	0.230285	-3.57393
ADAM10	1.00564	5.13645	2.64632	0.0229696	0.230604	-3.57805
APOL1	1.08193	5.6288	2.64611	0.0229783	0.230604	-3.57841
GYG2	-1.62978	4.37475	-2.6431	0.0231015	0.231043	-3.58348
CXCL3	-1.01077	6.13039	-2.64272	0.023117	0.231043	-3.58412
ABLIM3	-1.19109	6.07442	-2.64023	0.0232192	0.231809	-3.58831
AGT	-1.48904	6.18167	-2.6385	0.0232908	0.232269	-3.59123
IPO8	1.14759	2.19176	2.62704	0.0237692	0.234721	-3.61051
CHRNE	1.05946	4.04637	2.61128	0.0244433	0.236888	-3.637
IL6	-1.61074	7.81299	-2.60981	0.0245072	0.236888	-3.63947
CEP112	-1.49367	2.22787	-2.60914	0.0245363	0.236888	-3.6406
ASCC3	1.65456	1.07406	2.6079	0.0245904	0.236996	-3.64268
SULF1	1.20185	5.76349	2.60355	0.0247808	0.237882	-3.64999
MS4A2	1.31563	4.19787	2.59767	0.0250409	0.238627	-3.65987
RFPL3S	-2.24545	0.397539	-2.59607	0.0251119	0.238627	-3.66255
GLRB	1.19204	4.63732	2.59276	0.0252598	0.239047	-3.66811
DUX1	1.05383	4.01592	2.59189	0.0252986	0.239093	-3.66956
PAQR4	1.13387	3.68265	2.58667	0.0255339	0.240141	-3.67832
ERVW-1	1.53712	1.75606	2.57009	0.0262955	0.244769	-3.7061
UHRF2	-1.33072	1.4375	-2.56852	0.026369	0.244952	-3.70874
GPM6A	1.14843	2.21317	2.56692	0.0264438	0.245145	-3.71142
PDE8B	-1.22195	4.17585	-2.54692	0.0273976	0.251394	-3.74488
CEACAM6	1.20414	1.21878	2.54203	0.0276356	0.252585	-3.75304
C18orf25	-1.03266	1.38657	-2.53968	0.0277511	0.252756	-3.75697
SEMA3A	1.37813	5.30448	2.53644	0.027911	0.253571	-3.76239
LTB4R	-1.23017	4.65238	-2.53556	0.0279544	0.253712	-3.76386
ALDH5A1	1.14346	3.76787	2.52688	0.0283871	0.256141	-3.77834
ATF5	-1.379	7.25645	-2.52557	0.0284529	0.256443	-3.78052
HSPA12A	1.52513	3.98131	2.52417	0.0285238	0.256827	-3.78287
ARHGAP5	1.0817	3.59142	2.51739	0.0288681	0.257267	-3.79417
GABPB1	-1.315	1.83627	-2.51147	0.0291719	0.258059	-3.80403
IL17A	1.39297	1.87983	2.51017	0.0292389	0.2584	-3.80619
DES	-1.54652	5.56687	-2.50475	0.0295206	0.259627	-3.81522
ARMC8	-1.33424	2.14425	-2.50353	0.0295847	0.259939	-3.81726
BTC	1.33795	4.03428	2.50227	0.0296504	0.260079	-3.81935
SELP	1.07029	6.17916	2.49344	0.0301169	0.262577	-3.83404
FABP2	1.7617	0.540302	2.49291	0.0301451	0.262577	-3.83492
GPR98	-1.24088	1.12745	-2.4916	0.030215	0.262682	-3.8371
DHX34	-1.23392	3.41741	-2.48519	0.0305594	0.264476	-3.84776
C17orf75	1.32836	3.15262	2.48451	0.0305959	0.264476	-3.84889
MSANTD3-TMEFF1	-1.75085	0.343755	-2.48382	0.0306337	0.26455	-3.85004
NMI	1.01552	6.12046	2.48083	0.0307959	0.264944	-3.85501
CA12	-1.00843	5.98637	-2.47654	0.03103	0.265951	-3.86213
NCF1	1.42755	7.8934	2.47257	0.0312487	0.26716	-3.86873
SERPINI2	-1.34357	1.73313	-2.46972	0.0314061	0.267203	-3.87345
AGA	1.15621	3.84191	2.46963	0.0314114	0.267203	-3.87361
CCNB2	1.19412	2.58565	2.46562	0.0316343	0.268847	-3.88025
MFGE8	-1.00261	8.31448	-2.46028	0.0319343	0.270385	-3.88911
SCGN	-1.08892	2.95532	-2.43651	0.0333022	0.27605	-3.92846
ATXN7	-1.18784	2.10378	-2.42156	0.0341918	0.280101	-3.95316
ROBO1	1.41437	3.53607	2.41259	0.0347367	0.283258	-3.96796
RHBDD3	1.16417	6.03934	2.41214	0.0347642	0.283258	-3.9687
HPD	1.27491	3.66537	2.40888	0.0349644	0.283871	-3.97408
HDAC9	1.50739	0.870977	2.39609	0.035761	0.288746	-3.99515
PHF14	1.00902	1.89205	2.39357	0.03592	0.289302	-3.99929
IREB2	1.63968	1.83256	2.39264	0.0359788	0.289519	-4.00082
HMGB3P30	-1.44138	2.67862	-2.39048	0.0361162	0.290368	-4.00439
PCYT2	-1.10797	5.36472	-2.3896	0.0361716	0.290556	-4.00582
FCN1	1.47226	3.85582	2.38217	0.036648	0.293087	-4.01804
TNNI1	2.19644	4.75401	2.37432	0.0371572	0.295894	-4.03093
CD3D	1.01802	4.02878	2.36265	0.0379275	0.299627	-4.05007
GFER	-1.02884	3.81394	-2.35645	0.0383432	0.300819	-4.06024
AKR1B10	-1.31817	3.77848	-2.35324	0.0385599	0.301127	-4.06549
CCL13	-1.27326	4.8639	-2.35244	0.0386146	0.301127	-4.06681
PAPPA2	-1.30977	2.27372	-2.35059	0.0387402	0.30163	-4.06984
PSG9	-1.00131	1.86333	-2.34601	0.0390528	0.302468	-4.07733
NR1D1	-1.02108	7.7028	-2.33715	0.039665	0.304112	-4.09182
C9	-1.17198	4.1702	-2.33389	0.0398929	0.304696	-4.09715
LRMP	1.35284	3.53249	2.32864	0.0402617	0.305834	-4.10571
PINLYP	1.23534	2.65829	2.32704	0.0403747	0.306436	-4.10832
HPGDS	1.23654	6.79786	2.32264	0.0406879	0.307529	-4.11551
ASTN1	-1.79265	-0.727232	-2.30932	0.0416492	0.311939	-4.13721
GNLY	1.59042	3.06054	2.30434	0.0420142	0.313382	-4.14532
SSX2IP	-1.18291	-0.250723	-2.2957	0.0426542	0.316596	-4.15935
ADAM28	1.86128	1.99456	2.29442	0.0427504	0.316698	-4.16144
HCG4	1.72218	0.980897	2.29153	0.0429671	0.317363	-4.16614
ZFP37	1.33109	3.38263	2.27676	0.0440915	0.319898	-4.19009
PRKG1	1.00234	2.91984	2.27611	0.0441414	0.319898	-4.19114
KIAA1024	1.06444	3.57878	2.27412	0.0442952	0.319898	-4.19436
ZNF862	1.23526	4.30532	2.272	0.0444597	0.319898	-4.19779
EPYC	1.37533	3.11076	2.27142	0.0445051	0.319898	-4.19874
EPCAM	1.70895	2.52442	2.26974	0.0446359	0.319898	-4.20146
BCAT1	1.05101	6.83401	2.2635	0.0451257	0.32097	-4.21156
INADL	-1.80096	0.989373	-2.25935	0.0454537	0.322363	-4.21827
RARS2	1.16202	-0.198069	2.25857	0.0455154	0.322461	-4.21952
TNFRSF17	1.63217	2.0701	2.25828	0.0455386	0.322461	-4.21999
RABGAP1L	1.03753	5.06132	2.25232	0.0460148	0.325073	-4.22962
MATN3	-1.22247	0.33479	-2.24586	0.0465366	0.326292	-4.24005
PDK4	-1.22385	4.28819	-2.24085	0.0469455	0.326292	-4.24813
CCNE2	1.41839	0.800213	2.23924	0.0470771	0.326292	-4.25072
CD180	1.47349	4.74028	2.23769	0.0472047	0.326683	-4.25322
GPR65	2.23177	1.88017	2.2354	0.0473933	0.326683	-4.2569
GPM6B	-1.45159	3.07438	-2.23064	0.0477882	0.327012	-4.26457
PRIM1	1.02047	3.91	2.22996	0.047845	0.327012	-4.26566
FBXL2	1.57367	3.53191	2.22787	0.04802	0.327032	-4.26903
APBA1	1.23858	3.37144	2.22109	0.0485902	0.329649	-4.27992
SERPINE2	-1.28175	7.21698	-2.21244	0.049328	0.332301	-4.29382
N4BP3	-1.26378	2.60672	-2.21227	0.0493422	0.332301	-4.29409
TLR5	1.17363	4.87052	2.21164	0.0493966	0.33233	-4.2951
CCNC	1.10945	3.57726	2.2101	0.0495294	0.33233	-4.29758

## Sheet: Table S2 DEGs in GSE55235
Table S2. The differentially expressed genes in GSE55235 use limma package.
Gene	sampleA	sampleB	logFC	AveExpr	t	P.Value	adj.P.Val	B
KLF9	Normal	Osteoarthritis	-2.89449	7.99048	-17.3852	2.92619e-17	2.01936e-13	28.6687
SLC19A2	Normal	Osteoarthritis	-2.81281	6.75236	-15.7326	4.44567e-16	1.53398e-12	26.2036
NFIL3	Normal	Osteoarthritis	-3.79772	8.64223	-14.3766	4.93511e-15	1.13524e-11	23.9827
BCL6	Normal	Osteoarthritis	-2.10173	9.86965	-12.9666	7.28041e-14	1.25605e-10	21.4613
GADD45A	Normal	Osteoarthritis	-2.91581	8.61038	-11.9396	5.91136e-13	8.15887e-10	19.4754
NFKBIA	Normal	Osteoarthritis	-2.36431	10.8016	-10.8759	5.88808e-12	6.64386e-09	17.2755
GADD45B	Normal	Osteoarthritis	-3.37508	9.11806	-10.8154	6.73917e-12	6.64386e-09	17.1457
HSPA1A	Normal	Osteoarthritis	-1.80793	10.077	-10.6745	9.24254e-12	7.97284e-09	16.8418
CX3CR1	Normal	Osteoarthritis	3.47171	6.79763	10.3296	2.02444e-11	1.55229e-08	16.0861
MXRA5	Normal	Osteoarthritis	3.38045	9.41111	10.1194	3.28904e-11	2.26977e-08	15.6174
LTC4S	Normal	Osteoarthritis	4.41622	4.04099	10.0206	4.13977e-11	2.59714e-08	15.395
MTHFD2	Normal	Osteoarthritis	-1.89642	8.64071	-9.97081	4.65078e-11	2.67459e-08	15.2824
MYC	Normal	Osteoarthritis	-2.60243	8.77325	-9.89447	5.56313e-11	2.82763e-08	15.1091
BTG2	Normal	Osteoarthritis	-1.63397	8.49109	-9.86167	6.00957e-11	2.82763e-08	15.0344
CDKN1A	Normal	Osteoarthritis	-2.40141	8.76801	-9.85213	6.14612e-11	2.82763e-08	15.0126
PIGA	Normal	Osteoarthritis	-2.4344	5.95478	-9.76728	7.5103e-11	3.23929e-08	14.8185
ATF3	Normal	Osteoarthritis	-3.17757	8.07806	-9.69317	8.95409e-11	3.45705e-08	14.6481
C10orf10	Normal	Osteoarthritis	-2.28562	9.23731	-9.67386	9.37494e-11	3.45705e-08	14.6036
SIK1	Normal	Osteoarthritis	-3.34247	7.80377	-9.6675	9.51805e-11	3.45705e-08	14.5889
CEBPD	Normal	Osteoarthritis	-2.39513	10.8511	-9.48111	1.48683e-10	5.1211e-08	14.1563
MAFF	Normal	Osteoarthritis	-2.70357	6.80749	-9.46159	1.55837e-10	5.1211e-08	14.1107
HLA-DMB	Normal	Osteoarthritis	2.13009	9.88366	9.41864	1.72836e-10	5.42156e-08	14.0102
ZFP36	Normal	Osteoarthritis	-2.40791	10.3273	-9.23965	2.66786e-10	8.00475e-08	13.5886
BTG1	Normal	Osteoarthritis	-1.34742	10.608	-9.1529	3.2976e-10	9.48196e-08	13.3826
UCP2	Normal	Osteoarthritis	1.7477	8.96862	9.11952	3.57867e-10	9.87855e-08	13.303
NID2	Normal	Osteoarthritis	2.23739	8.60666	8.90329	6.10114e-10	1.61938e-07	12.784
NREP	Normal	Osteoarthritis	2.15906	7.76241	8.81037	7.68745e-10	1.96485e-07	12.5589
IGLC1	Normal	Osteoarthritis	5.02551	9.95617	8.77806	8.33318e-10	2.05383e-07	12.4803
DDIT4	Normal	Osteoarthritis	-3.32522	9.89005	-8.69132	1.0354e-09	2.4639e-07	12.2688
KDELR3	Normal	Osteoarthritis	1.38408	8.2122	8.67271	1.08493e-09	2.4957e-07	12.2232
HLA-DPB1	Normal	Osteoarthritis	1.75551	11.3008	8.6151	1.25412e-09	2.79183e-07	12.082
FLRT2	Normal	Osteoarthritis	2.21222	7.0243	8.31297	2.70054e-09	5.82389e-07	11.3337
MEST	Normal	Osteoarthritis	2.72114	7.94748	8.29582	2.8217e-09	5.90078e-07	11.2909
MCL1	Normal	Osteoarthritis	-1.34811	9.713	-8.24032	3.25321e-09	6.60307e-07	11.1519
DAB2	Normal	Osteoarthritis	1.1768	10.5075	8.16559	3.94275e-09	7.76823e-07	10.9642
CSK	Normal	Osteoarthritis	1.46363	7.8236	8.15142	4.08946e-09	7.76823e-07	10.9285
BTG3	Normal	Osteoarthritis	-1.20564	8.03457	-8.14433	4.16497e-09	7.76823e-07	10.9106
DNAJB1	Normal	Osteoarthritis	-1.57427	8.6148	-8.13291	4.28954e-09	7.79002e-07	10.8818
SLC16A7	Normal	Osteoarthritis	-3.01297	7.01794	-8.04289	5.41443e-09	9.58077e-07	10.6543
PIM1	Normal	Osteoarthritis	-2.13689	7.84116	-8.00541	5.96753e-09	1.02955e-06	10.5593
TNFAIP3	Normal	Osteoarthritis	-2.32462	8.62173	-7.9427	7.02487e-09	1.18241e-06	10.3998
PLIN2	Normal	Osteoarthritis	-2.76039	8.91718	-7.9068	7.71423e-09	1.26752e-06	10.3083
COL3A1	Normal	Osteoarthritis	1.95005	11.9641	7.88758	8.11113e-09	1.28982e-06	10.2592
LRRC17	Normal	Osteoarthritis	2.32435	7.21374	7.88231	8.22374e-09	1.28982e-06	10.2458
APOD	Normal	Osteoarthritis	-4.04847	8.79267	-7.86776	8.54244e-09	1.31003e-06	10.2086
ADM	Normal	Osteoarthritis	-2.85236	9.15093	-7.85355	8.86591e-09	1.33008e-06	10.1723
SCRG1	Normal	Osteoarthritis	2.99303	8.10167	7.81899	9.70558e-09	1.42507e-06	10.0838
PRSS23	Normal	Osteoarthritis	1.46129	9.18198	7.79272	1.03977e-08	1.49489e-06	10.0164
PPP1R15A	Normal	Osteoarthritis	-2.59702	7.87453	-7.77645	1.08515e-08	1.52829e-06	9.97462
LY86	Normal	Osteoarthritis	1.43238	8.55039	7.70787	1.29965e-08	1.76056e-06	9.79819
SLC23A2	Normal	Osteoarthritis	1.50316	6.0723	7.70745	1.3011e-08	1.76056e-06	9.7971
NEDD9	Normal	Osteoarthritis	-1.46198	6.72118	-7.64709	1.52567e-08	2.02474e-06	9.64133
ZBTB16	Normal	Osteoarthritis	-2.68423	7.88234	-7.60514	1.70462e-08	2.17844e-06	9.53281
HLA-DRB1	Normal	Osteoarthritis	1.35828	12.1842	7.53014	2.07965e-08	2.60939e-06	9.33821
RPGR	Normal	Osteoarthritis	-1.71587	5.4716	-7.47048	2.43715e-08	3.00335e-06	9.18295
EPB41L2	Normal	Osteoarthritis	1.09264	8.66409	7.4638	2.48091e-08	3.00364e-06	9.16553
EPHB2	Normal	Osteoarthritis	1.28366	6.07144	7.45624	2.53139e-08	3.01192e-06	9.14581
TYROBP	Normal	Osteoarthritis	1.62575	9.94269	7.41731	2.80832e-08	3.28478e-06	9.04418
DUSP2	Normal	Osteoarthritis	-3.25263	4.6329	-7.40887	2.87232e-08	3.30364e-06	9.02213
SPEN	Normal	Osteoarthritis	-1.05604	8.04201	-7.34021	3.45114e-08	3.90431e-06	8.84239
ABCC3	Normal	Osteoarthritis	2.39645	6.14159	7.30988	3.74327e-08	4.1665e-06	8.76283
ZFP36L2	Normal	Osteoarthritis	-1.31256	9.83234	-7.30222	3.82096e-08	4.18547e-06	8.74272
LAMA4	Normal	Osteoarthritis	1.43611	8.54111	7.27248	4.13846e-08	4.46242e-06	8.66456
MARCKS	Normal	Osteoarthritis	1.43591	8.6913	7.25489	4.33876e-08	4.5465e-06	8.61827
MGAT4C	Normal	Osteoarthritis	2.47657	4.09687	7.25408	4.34819e-08	4.5465e-06	8.61615
KAL1	Normal	Osteoarthritis	2.25019	7.01941	7.23131	4.62281e-08	4.76149e-06	8.55617
BLNK	Normal	Osteoarthritis	1.39206	7.16748	7.18974	5.1703e-08	5.24709e-06	8.44656
GABARAPL1	Normal	Osteoarthritis	-1.51939	7.79368	-7.14016	5.91022e-08	5.91107e-06	8.31556
SORL1	Normal	Osteoarthritis	1.40048	8.30016	7.05266	7.48855e-08	7.38264e-06	8.08373
MT1G	Normal	Osteoarthritis	-1.6331	11.0702	-7.0279	8.00849e-08	7.78403e-06	8.01797
JUND	Normal	Osteoarthritis	-1.23041	10.2876	-6.97945	9.13448e-08	8.75514e-06	7.8891
OSBPL3	Normal	Osteoarthritis	1.26637	6.21406	6.96315	9.54831e-08	8.98047e-06	7.8457
THY1	Normal	Osteoarthritis	1.78988	8.21033	6.96002	9.62984e-08	8.98047e-06	7.83737
CBLB	Normal	Osteoarthritis	-1.61371	7.51522	-6.95209	9.8398e-08	9.05393e-06	7.81624
ANGPTL7	Normal	Osteoarthritis	-4.41755	4.5851	-6.94108	1.01392e-07	9.08712e-06	7.78687
EIF1	Normal	Osteoarthritis	-1.1341	11.5325	-6.87415	1.21677e-07	1.06741e-05	7.6082
PTGS2	Normal	Osteoarthritis	-3.26649	5.30033	-6.8726	1.22193e-07	1.06741e-05	7.60406
ADH1B	Normal	Osteoarthritis	-2.67286	6.28351	-6.86703	1.24066e-07	1.07022e-05	7.58916
RGS2	Normal	Osteoarthritis	-2.08615	9.10976	-6.85586	1.27906e-07	1.08973e-05	7.55929
PLXNB2	Normal	Osteoarthritis	1.48818	8.63215	6.83279	1.36229e-07	1.13633e-05	7.49753
PPIC	Normal	Osteoarthritis	1.15698	9.23844	6.82578	1.38862e-07	1.14082e-05	7.47877
CLEC3B	Normal	Osteoarthritis	1.59624	10.9055	6.81523	1.42925e-07	1.16038e-05	7.45052
YBX3	Normal	Osteoarthritis	-1.06668	10.4954	-6.79862	1.49569e-07	1.2002e-05	7.406
CSF1R	Normal	Osteoarthritis	1.68836	9.38708	6.75683	1.67702e-07	1.33024e-05	7.29389
FUCA1	Normal	Osteoarthritis	1.40366	9.70906	6.74559	1.72953e-07	1.3563e-05	7.26368
ISLR	Normal	Osteoarthritis	1.65483	9.63908	6.7393	1.7596e-07	1.36423e-05	7.24679
FOSB	Normal	Osteoarthritis	-5.12549	8.14881	-6.73527	1.77917e-07	1.36423e-05	7.23596
SLC2A3	Normal	Osteoarthritis	-3.03747	7.09901	-6.72221	1.84403e-07	1.39842e-05	7.20088
AKR7A2	Normal	Osteoarthritis	1.11662	7.21675	6.69828	1.96923e-07	1.47396e-05	7.13651
LOC101928830	Normal	Osteoarthritis	1.74529	9.78744	6.69513	1.98635e-07	1.47396e-05	7.12803
DDX21	Normal	Osteoarthritis	-1.60158	9.0623	-6.67385	2.10595e-07	1.54608e-05	7.07075
CD4	Normal	Osteoarthritis	1.21421	8.22646	6.64982	2.2498e-07	1.6343e-05	7.00601
ITGAM	Normal	Osteoarthritis	1.23761	8.91108	6.62356	2.41835e-07	1.73844e-05	6.93523
PLA2G15	Normal	Osteoarthritis	1.29123	6.55894	6.58852	2.66349e-07	1.89492e-05	6.84063
CYR61	Normal	Osteoarthritis	-2.24098	9.4981	-6.58237	2.70902e-07	1.90765e-05	6.82402
COL1A2	Normal	Osteoarthritis	1.55086	11.9181	6.52465	3.1768e-07	2.19739e-05	6.66796
HMGB2	Normal	Osteoarthritis	-1.56631	8.38999	-6.52381	3.18416e-07	2.19739e-05	6.6657
CRIP1	Normal	Osteoarthritis	2.22815	9.75542	6.49984	3.40217e-07	2.32459e-05	6.60081
TOP2A	Normal	Osteoarthritis	1.922	4.11973	6.4817	3.57718e-07	2.42021e-05	6.55167
NCF1	Normal	Osteoarthritis	3.15628	7.14981	6.46197	3.77788e-07	2.53118e-05	6.49819
PHC2	Normal	Osteoarthritis	-1.11179	9.00281	-6.45102	3.89414e-07	2.57388e-05	6.46849
LDLR	Normal	Osteoarthritis	-2.14303	6.60171	-6.44898	3.91621e-07	2.57388e-05	6.46295
IRS2	Normal	Osteoarthritis	-1.61203	7.83779	-6.43231	4.10131e-07	2.67011e-05	6.41771
CIITA	Normal	Osteoarthritis	2.00743	5.05558	6.40714	4.39756e-07	2.78338e-05	6.34939
RBPMS	Normal	Osteoarthritis	-1.2727	7.31932	-6.4035	4.4422e-07	2.78338e-05	6.33949
SPRY2	Normal	Osteoarthritis	-1.41789	7.31974	-6.40069	4.47696e-07	2.78338e-05	6.33186
GPR183	Normal	Osteoarthritis	-1.86262	7.45458	-6.3852	4.6735e-07	2.84203e-05	6.28977
FOXO3	Normal	Osteoarthritis	-1.52126	8.90442	-6.38355	4.69485e-07	2.84203e-05	6.2853
CXCL8	Normal	Osteoarthritis	-3.56116	7.9151	-6.35075	5.14244e-07	3.05931e-05	6.19609
PTPRO	Normal	Osteoarthritis	1.26385	6.78003	6.32469	5.52856e-07	3.26091e-05	6.12517
BNIP3	Normal	Osteoarthritis	-1.297	7.17005	-6.30566	5.8289e-07	3.40892e-05	6.07335
IL1R1	Normal	Osteoarthritis	-1.43167	9.8347	-6.29368	6.02627e-07	3.49239e-05	6.04073
HLA-DQB1	Normal	Osteoarthritis	1.55558	11.2661	6.29092	6.07284e-07	3.49239e-05	6.03319
IFRD1	Normal	Osteoarthritis	-1.54347	6.61634	-6.23004	7.19451e-07	4.06962e-05	5.86718
PNRC1	Normal	Osteoarthritis	-1.70661	9.48325	-6.21848	7.43e-07	4.16865e-05	5.83563
HK3	Normal	Osteoarthritis	2.73781	5.7256	6.18342	8.19318e-07	4.48606e-05	5.73987
HSD11B1	Normal	Osteoarthritis	-1.12611	7.07603	-6.18069	8.25589e-07	4.48606e-05	5.7324
CBX6	Normal	Osteoarthritis	1.1144	7.77513	6.17877	8.3003e-07	4.48606e-05	5.72715
COL1A1	Normal	Osteoarthritis	2.70182	9.26015	6.17772	8.3246e-07	4.48606e-05	5.72429
TIMP1	Normal	Osteoarthritis	1.26084	12.209	6.17188	8.46136e-07	4.48606e-05	5.70833
CD74	Normal	Osteoarthritis	1.14639	12.1962	6.17079	8.48727e-07	4.48606e-05	5.70533
FAM107A	Normal	Osteoarthritis	-2.35005	5.77479	-6.16791	8.55576e-07	4.48606e-05	5.69746
IGHM	Normal	Osteoarthritis	3.3338	7.88015	6.16729	8.57049e-07	4.48606e-05	5.69578
GALNT1	Normal	Osteoarthritis	1.00093	8.41419	6.16686	8.58078e-07	4.48606e-05	5.6946
HPGDS	Normal	Osteoarthritis	1.50007	7.0926	6.15578	8.85022e-07	4.59213e-05	5.66432
MAP3K8	Normal	Osteoarthritis	-1.77969	6.37194	-6.14364	9.15561e-07	4.71514e-05	5.6311
NR4A2	Normal	Osteoarthritis	-2.57244	6.49099	-6.13155	9.46995e-07	4.8409e-05	5.59804
MIR5193	Normal	Osteoarthritis	1.00145	7.1933	6.1171	9.86008e-07	5.00326e-05	5.55851
RRM2	Normal	Osteoarthritis	2.16822	4.75315	6.09806	1.03991e-06	5.20032e-05	5.50639
SOCS3	Normal	Osteoarthritis	-1.80979	7.12618	-6.08831	1.06865e-06	5.3056e-05	5.47969
TTC3	Normal	Osteoarthritis	1.07167	8.64685	6.08351	1.0831e-06	5.31224e-05	5.46654
EMP1	Normal	Osteoarthritis	-1.10566	9.7871	-6.07868	1.09786e-06	5.33542e-05	5.45329
JUN	Normal	Osteoarthritis	-2.26664	9.5096	-6.07506	1.10901e-06	5.35194e-05	5.4434
ETS2	Normal	Osteoarthritis	-1.29784	7.79631	-6.06975	1.12562e-06	5.3944e-05	5.42884
TRIL	Normal	Osteoarthritis	1.50277	6.35241	6.05322	1.17892e-06	5.5724e-05	5.38354
GLRX	Normal	Osteoarthritis	-1.56505	9.58943	-6.04166	1.21768e-06	5.71648e-05	5.35187
LGMN	Normal	Osteoarthritis	1.46433	9.7025	6.03466	1.24179e-06	5.77569e-05	5.33267
DOCK4	Normal	Osteoarthritis	1.32379	7.29591	6.03316	1.24703e-06	5.77569e-05	5.32855
EDNRB	Normal	Osteoarthritis	-1.51343	6.67851	-6.01201	1.32314e-06	6.08735e-05	5.27054
PART1	Normal	Osteoarthritis	2.00311	4.79321	6.00597	1.34572e-06	6.14626e-05	5.25398
RRAD	Normal	Osteoarthritis	-2.80478	4.69246	-6.00384	1.35376e-06	6.14626e-05	5.24815
ABLIM1	Normal	Osteoarthritis	-1.39363	8.74105	-5.96865	1.49415e-06	6.73928e-05	5.15156
TGIF1	Normal	Osteoarthritis	-1.06742	7.55291	-5.94853	1.58089e-06	7.08422e-05	5.09632
USP46	Normal	Osteoarthritis	1.35542	5.36427	5.94169	1.61154e-06	7.12899e-05	5.07752
SLC18A2	Normal	Osteoarthritis	2.47623	4.51299	5.93017	1.66446e-06	7.31618e-05	5.0459
DUSP8	Normal	Osteoarthritis	-1.4678	5.77395	-5.92695	1.67959e-06	7.33597e-05	5.03704
DUSP5	Normal	Osteoarthritis	-1.69522	7.10348	-5.91903	1.71734e-06	7.45369e-05	5.01528
PCOLCE	Normal	Osteoarthritis	1.33054	10.2545	5.91	1.76144e-06	7.59731e-05	4.99047
CXADR	Normal	Osteoarthritis	2.41126	5.89831	5.90372	1.79279e-06	7.68451e-05	4.9732
OAS1	Normal	Osteoarthritis	1.23911	6.99318	5.90052	1.80896e-06	7.70594e-05	4.96441
C2	Normal	Osteoarthritis	1.34114	8.57532	5.86054	2.02404e-06	8.46539e-05	4.85447
EPYC	Normal	Osteoarthritis	2.65096	5.17041	5.82705	2.22385e-06	9.18967e-05	4.76235
ENC1	Normal	Osteoarthritis	1.47249	5.84287	5.82089	2.26276e-06	9.29481e-05	4.74537
CD2	Normal	Osteoarthritis	1.48458	6.93216	5.80347	2.37641e-06	9.70393e-05	4.69742
LGALS1	Normal	Osteoarthritis	1.06824	11.2905	5.80061	2.39563e-06	9.72486e-05	4.68954
IKZF1	Normal	Osteoarthritis	1.34466	6.18955	5.77943	2.54278e-06	0.000100943	4.63122
CYBB	Normal	Osteoarthritis	1.45137	8.22977	5.77909	2.54515e-06	0.000100943	4.63031
PPAP2B	Normal	Osteoarthritis	-1.67433	9.69993	-5.77086	2.60487e-06	0.000102721	4.60762
IFI30	Normal	Osteoarthritis	1.90266	11.2781	5.768	2.62593e-06	0.000102752	4.59974
GJA4	Normal	Osteoarthritis	-2.90887	6.18628	-5.76671	2.63544e-06	0.000102752	4.59621
CD52	Normal	Osteoarthritis	2.7494	5.96714	5.75623	2.71439e-06	0.000105236	4.56733
PTPRC	Normal	Osteoarthritis	2.67942	7.13861	5.72965	2.9254e-06	0.000110924	4.4941
CDC42EP3	Normal	Osteoarthritis	-1.19521	6.28705	-5.72261	2.98398e-06	0.000112527	4.4747
BZW1	Normal	Osteoarthritis	-1.22635	9.74472	-5.71347	3.06189e-06	0.000114008	4.4495
PTGS1	Normal	Osteoarthritis	1.12037	7.21781	5.7122	3.07282e-06	0.000114008	4.44601
BGN	Normal	Osteoarthritis	1.71255	9.12491	5.69817	3.19683e-06	0.000117975	4.40731
TDO2	Normal	Osteoarthritis	1.46407	6.18705	5.67774	3.38629e-06	0.000124178	4.35101
COL5A1	Normal	Osteoarthritis	1.94693	8.1803	5.67622	3.4009e-06	0.000124178	4.3468
ARHGAP25	Normal	Osteoarthritis	2.41209	5.77947	5.61728	4.01606e-06	0.0001436	4.18422
JUNB	Normal	Osteoarthritis	-1.67624	9.69481	-5.61352	4.0589e-06	0.000144384	4.17385
ARHGEF9	Normal	Osteoarthritis	1.16714	5.329	5.60412	4.16803e-06	0.000147505	4.14791
CORO1A	Normal	Osteoarthritis	1.96837	6.54846	5.59572	4.26804e-06	0.000150274	4.12473
LIPC	Normal	Osteoarthritis	1.93156	3.26096	5.5928	4.30332e-06	0.000150747	4.11668
MT1X	Normal	Osteoarthritis	-1.56173	12.0229	-5.57135	4.57199e-06	0.00015935	4.05748
NAP1L3	Normal	Osteoarthritis	1.47761	6.53	5.5568	4.76386e-06	0.000164377	4.0173
WASF3	Normal	Osteoarthritis	-1.16099	7.70409	-5.54588	4.91297e-06	0.000167513	3.98718
CHD1	Normal	Osteoarthritis	-1.23041	7.15634	-5.54309	4.95184e-06	0.000167513	3.97948
CAPG	Normal	Osteoarthritis	1.61006	8.59902	5.53823	5.02036e-06	0.000169003	3.96604
CBR3	Normal	Osteoarthritis	1.09179	7.89635	5.52487	5.21339e-06	0.000173042	3.92917
KLF6	Normal	Osteoarthritis	-1.62181	8.45076	-5.52472	5.21557e-06	0.000173042	3.92876
H1FX	Normal	Osteoarthritis	-1.80692	8.74799	-5.51867	5.30557e-06	0.000175185	3.91204
GAS2L1	Normal	Osteoarthritis	1.05347	5.59955	5.50356	5.53698e-06	0.000180077	3.87032
FOLR2	Normal	Osteoarthritis	1.10147	9.51139	5.50336	5.54014e-06	0.000180077	3.86977
TTLL1	Normal	Osteoarthritis	1.77068	5.28186	5.50221	5.55809e-06	0.000180077	3.86661
FOSL2	Normal	Osteoarthritis	-2.08139	5.73455	-5.48864	5.77543e-06	0.000185378	3.82913
GAP43	Normal	Osteoarthritis	3.3095	4.93649	5.47584	5.9883e-06	0.000190439	3.79376
CYBA	Normal	Osteoarthritis	1.47615	9.5979	5.46918	6.10199e-06	0.000192282	3.77539
CXCL3	Normal	Osteoarthritis	-3.54943	5.54141	-5.46417	6.18914e-06	0.000194142	3.76153
IER2	Normal	Osteoarthritis	-1.59154	10.7208	-5.44626	6.5106e-06	0.000203302	3.71207
SEMA3A	Normal	Osteoarthritis	1.23847	6.5467	5.44215	6.58668e-06	0.000204751	3.70072
LIPA	Normal	Osteoarthritis	1.3362	10.2402	5.43882	6.64897e-06	0.00020576	3.69152
PMAIP1	Normal	Osteoarthritis	-3.07448	5.24329	-5.40137	7.3918e-06	0.000223854	3.58808
FBP1	Normal	Osteoarthritis	1.61703	8.28123	5.40134	7.39234e-06	0.000223854	3.58801
NR1D1	Normal	Osteoarthritis	-3.87952	5.61101	-5.38647	7.70992e-06	0.000231129	3.54693
CITED2	Normal	Osteoarthritis	-1.26313	7.74378	-5.38525	7.73668e-06	0.000231129	3.54355
ZFHX3	Normal	Osteoarthritis	-1.36526	6.2191	-5.37746	7.90906e-06	0.000233381	3.52203
STC1	Normal	Osteoarthritis	-1.6148	6.06987	-5.37726	7.9135e-06	0.000233381	3.52148
SLC37A4	Normal	Osteoarthritis	1.23997	5.97404	5.37319	8.00521e-06	0.000235081	3.51023
BTN3A3	Normal	Osteoarthritis	1.84441	6.28678	5.36865	8.10866e-06	0.000236534	3.49769
SYK	Normal	Osteoarthritis	1.49426	6.07476	5.36667	8.15412e-06	0.000236534	3.49223
HNMT	Normal	Osteoarthritis	1.21422	7.55773	5.36652	8.15753e-06	0.000236534	3.49182
ME2	Normal	Osteoarthritis	1.20174	8.7222	5.36196	8.26357e-06	0.000238606	3.47921
GAMT	Normal	Osteoarthritis	2.04586	3.32414	5.33375	8.9501e-06	0.000257353	3.4013
SDC4	Normal	Osteoarthritis	-1.52794	8.58027	-5.3321	8.99208e-06	0.000257487	3.39673
CD180	Normal	Osteoarthritis	1.50214	6.79756	5.32048	9.29277e-06	0.000264998	3.36462
MTSS1	Normal	Osteoarthritis	-1.10993	8.5128	-5.31723	9.37843e-06	0.00026634	3.35566
SSR4	Normal	Osteoarthritis	1.02508	10.49	5.2838	1.03091e-05	0.000289198	3.26332
KCNN4	Normal	Osteoarthritis	1.59927	6.23372	5.27176	1.06666e-05	0.00029393	3.23005
VASH1	Normal	Osteoarthritis	1.38633	6.53392	5.27163	1.06704e-05	0.00029393	3.2297
ARL4A	Normal	Osteoarthritis	-1.2995	7.21526	-5.26175	1.09732e-05	0.000299098	3.20239
BTN3A2	Normal	Osteoarthritis	1.23854	9.08742	5.26061	1.10087e-05	0.000299098	3.19924
ATXN1	Normal	Osteoarthritis	1.4465	7.28058	5.25536	1.11733e-05	0.000301349	3.18476
SOCS6	Normal	Osteoarthritis	1.28867	5.69105	5.25519	1.11789e-05	0.000301349	3.18428
EPHA3	Normal	Osteoarthritis	1.64748	6.54527	5.25278	1.12554e-05	0.000302231	3.17762
NBL1	Normal	Osteoarthritis	1.41239	8.89867	5.24397	1.15395e-05	0.00030866	3.15329
MIR6883	Normal	Osteoarthritis	-2.98376	7.01845	-5.242	1.16041e-05	0.000309187	3.14785
MNDA	Normal	Osteoarthritis	1.32811	7.04377	5.23986	1.16746e-05	0.000309306	3.14194
SEMA3C	Normal	Osteoarthritis	1.19687	9.24899	5.23915	1.16981e-05	0.000309306	3.13997
CNOT8	Normal	Osteoarthritis	-1.00411	7.50475	-5.23393	1.18722e-05	0.000312711	3.12556
DPT	Normal	Osteoarthritis	2.2055	9.02584	5.2079	1.27799e-05	0.000334068	3.0537
ADCY7	Normal	Osteoarthritis	1.22903	7.24013	5.19072	1.34171e-05	0.00034549	3.00624
CEBPA	Normal	Osteoarthritis	1.78933	7.65252	5.18232	1.374e-05	0.000351184	2.98305
BSCL2	Normal	Osteoarthritis	2.21342	5.94461	5.17204	1.41457e-05	0.000357581	2.95466
GUCA1A	Normal	Osteoarthritis	1.1601	5.24232	5.1336	1.57718e-05	0.000391514	2.84857
ZBTB43	Normal	Osteoarthritis	-1.01132	6.56693	-5.12979	1.59426e-05	0.000392929	2.83807
EGR1	Normal	Osteoarthritis	-1.46729	9.44961	-5.11362	1.66898e-05	0.00040988	2.79342
TRIB1	Normal	Osteoarthritis	-1.34678	9.01017	-5.08534	1.80804e-05	0.000441587	2.71541
VAV1	Normal	Osteoarthritis	1.13043	6.71147	5.08479	1.81088e-05	0.000441587	2.71388
TGFBR3	Normal	Osteoarthritis	-1.35659	9.25437	-5.07433	1.8653e-05	0.000451751	2.68503
RTN1	Normal	Osteoarthritis	2.04349	6.11863	5.07184	1.87847e-05	0.000453263	2.67818
LAMA2	Normal	Osteoarthritis	-1.95161	6.26471	-5.06044	1.94008e-05	0.000466499	2.64673
NELL1	Normal	Osteoarthritis	2.07162	3.98626	5.05169	1.98873e-05	0.000474887	2.6226
SIAH2	Normal	Osteoarthritis	-1.64696	5.7707	-5.04491	2.0273e-05	0.000479123	2.60389
GJA9	Normal	Osteoarthritis	1.05176	5.7432	5.02549	2.14181e-05	0.000502742	2.55036
MMP1	Normal	Osteoarthritis	4.23037	7.64957	5.02358	2.15343e-05	0.000503757	2.54509
ARL4C	Normal	Osteoarthritis	-1.12644	7.66627	-5.0158	2.20134e-05	0.000513224	2.52366
NR4A1	Normal	Osteoarthritis	-2.2601	6.98564	-5.01305	2.21853e-05	0.000513761	2.51608
SDC3	Normal	Osteoarthritis	1.91391	7.14955	5.00219	2.28782e-05	0.000525756	2.48613
REV3L	Normal	Osteoarthritis	-1.07591	8.37978	-5.00136	2.29318e-05	0.000525756	2.48385
EMP3	Normal	Osteoarthritis	1.10792	10.8007	4.99393	2.34193e-05	0.000534981	2.46336
HIRIP3	Normal	Osteoarthritis	1.24938	5.77052	4.99287	2.34892e-05	0.000534981	2.46046
CCR5	Normal	Osteoarthritis	1.66221	6.35099	4.96573	2.53637e-05	0.000573886	2.3857
LAIR1	Normal	Osteoarthritis	2.47135	5.65416	4.92883	2.81543e-05	0.000627496	2.2841
SMN1	Normal	Osteoarthritis	-1.24663	5.99179	-4.92871	2.81642e-05	0.000627496	2.28376
MMP9	Normal	Osteoarthritis	2.23834	7.93558	4.92841	2.81878e-05	0.000627496	2.28294
DPYSL3	Normal	Osteoarthritis	1.15425	8.7087	4.92604	2.83773e-05	0.000629683	2.27642
ITGBL1	Normal	Osteoarthritis	1.36973	9.0739	4.92274	2.86436e-05	0.000633557	2.26733
TNFRSF11A	Normal	Osteoarthritis	2.0148	4.51348	4.91909	2.89406e-05	0.000636049	2.25729
IL15RA	Normal	Osteoarthritis	-1.75964	6.15914	-4.89981	3.05627e-05	0.000669565	2.20423
ACOT7	Normal	Osteoarthritis	1.02313	7.02301	4.88508	3.18621e-05	0.000693629	2.16371
GCH1	Normal	Osteoarthritis	-2.01369	6.96595	-4.88182	3.21571e-05	0.000697849	2.15475
FLNB	Normal	Osteoarthritis	1.05224	7.09663	4.87792	3.25133e-05	0.000703368	2.14403
LOC101928620	Normal	Osteoarthritis	2.47269	5.79866	4.87326	3.29447e-05	0.000708437	2.13121
ACADL	Normal	Osteoarthritis	-1.98009	3.40889	-4.87317	3.2953e-05	0.000708437	2.13097
FADS1	Normal	Osteoarthritis	-1.13377	7.35455	-4.8685	3.33912e-05	0.000715629	2.11812
CDH11	Normal	Osteoarthritis	1.39626	8.56424	4.86466	3.37553e-05	0.000721193	2.10757
LRMP	Normal	Osteoarthritis	1.60593	6.40705	4.8617	3.40395e-05	0.00072502	2.09941
HCK	Normal	Osteoarthritis	1.17271	8.07651	4.859	3.42995e-05	0.000728309	2.09201
ITGB2	Normal	Osteoarthritis	1.09108	9.24743	4.85296	3.48906e-05	0.000734085	2.07539
NPAS2	Normal	Osteoarthritis	-1.50875	4.19412	-4.84918	3.52651e-05	0.000739564	2.06501
TFRC	Normal	Osteoarthritis	-1.50883	8.52274	-4.84818	3.53653e-05	0.000739564	2.06225
LOC101928916	Normal	Osteoarthritis	-1.5128	10.9871	-4.84045	3.61459e-05	0.000751334	2.04102
AHR	Normal	Osteoarthritis	1.06364	8.21848	4.82222	3.80568e-05	0.000785701	1.99093
GRN	Normal	Osteoarthritis	1.023	10.5669	4.82038	3.82547e-05	0.000785701	1.98588
CDH19	Normal	Osteoarthritis	-2.59068	3.55586	-4.80463	3.99947e-05	0.000819002	1.94264
GPR4	Normal	Osteoarthritis	-1.8309	5.47909	-4.7983	4.07162e-05	0.000831309	1.92526
TIMP4	Normal	Osteoarthritis	-2.00463	7.29516	-4.7916	4.14942e-05	0.000844694	1.90686
CD82	Normal	Osteoarthritis	1.15686	7.57028	4.73957	4.80587e-05	0.000962327	1.76415
ARHGAP6	Normal	Osteoarthritis	-1.52996	6.43716	-4.7392	4.81094e-05	0.000962327	1.76313
IL6	Normal	Osteoarthritis	-2.82345	7.21255	-4.71804	5.1069e-05	0.00101272	1.70514
STAB1	Normal	Osteoarthritis	1.0342	9.51798	4.70091	5.3597e-05	0.00105981	1.65822
RARG	Normal	Osteoarthritis	1.05091	6.01785	4.68381	5.62445e-05	0.00110268	1.61141
UAP1	Normal	Osteoarthritis	-1.35487	10.4736	-4.66739	5.89084e-05	0.00114479	1.56648
TK1	Normal	Osteoarthritis	1.38682	5.43417	4.6665	5.90562e-05	0.00114479	1.56405
HSPA6	Normal	Osteoarthritis	-1.35047	7.28904	-4.66269	5.96943e-05	0.00115392	1.55362
SEMA4D	Normal	Osteoarthritis	1.75483	5.18188	4.6568	6.06926e-05	0.00116994	1.53752
CBR1	Normal	Osteoarthritis	1.94796	5.97161	4.64924	6.19991e-05	0.00118849	1.51685
SYT17	Normal	Osteoarthritis	1.78196	4.6982	4.64485	6.2771e-05	0.00119995	1.50485
TRIM14	Normal	Osteoarthritis	1.08235	6.89668	4.64026	6.35872e-05	0.00120554	1.49231
PHKA1	Normal	Osteoarthritis	-1.95661	4.30834	-4.6265	6.61006e-05	0.00124667	1.4547
MT1H	Normal	Osteoarthritis	-1.51544	11.5878	-4.62641	6.61179e-05	0.00124667	1.45444
LOC732360	Normal	Osteoarthritis	-1.25364	6.34208	-4.61914	6.74854e-05	0.00126898	1.43458
FADS3	Normal	Osteoarthritis	-1.03115	6.8894	-4.60705	6.98212e-05	0.00130579	1.40158
DUSP1	Normal	Osteoarthritis	-1.44164	11.0479	-4.59122	7.30008e-05	0.00135789	1.35839
RHOBTB3	Normal	Osteoarthritis	-1.15812	7.96396	-4.58693	7.38874e-05	0.00136702	1.34668
PTPRF	Normal	Osteoarthritis	1.07699	6.32712	4.57665	7.6056e-05	0.00139963	1.31863
ZBTB14	Normal	Osteoarthritis	1.10776	4.97109	4.55997	7.97082e-05	0.00145136	1.27316
INHBB	Normal	Osteoarthritis	-1.89791	6.51493	-4.55128	8.16806e-05	0.00147778	1.24946
CFI	Normal	Osteoarthritis	1.28082	9.62546	4.55075	8.18016e-05	0.00147778	1.24803
SLC5A6	Normal	Osteoarthritis	-1.12054	6.79278	-4.54658	8.27676e-05	0.00149133	1.23665
HTR2B	Normal	Osteoarthritis	2.2713	5.14726	4.54482	8.31779e-05	0.00149482	1.23185
RGS16	Normal	Osteoarthritis	-1.34567	7.64715	-4.53977	8.4366e-05	0.00151223	1.21811
LAMA3	Normal	Osteoarthritis	-2.51482	4.37095	-4.5339	8.57684e-05	0.00153012	1.20213
CCL4	Normal	Osteoarthritis	-1.17846	7.77021	-4.53304	8.59775e-05	0.00153012	1.19977
ID2	Normal	Osteoarthritis	-1.04876	9.04696	-4.53282	8.60291e-05	0.00153012	1.19919
TYMS	Normal	Osteoarthritis	1.02127	6.84635	4.52475	8.80035e-05	0.0015611	1.1772
ST8SIA4	Normal	Osteoarthritis	1.64927	5.24242	4.52386	8.82231e-05	0.0015611	1.17479
CPA3	Normal	Osteoarthritis	1.42325	8.29949	4.5035	9.34144e-05	0.00163203	1.11939
ANK3	Normal	Osteoarthritis	1.35527	7.00567	4.50069	9.41555e-05	0.00163669	1.11174
AOX1	Normal	Osteoarthritis	-1.29045	7.117	-4.49512	9.56393e-05	0.00164711	1.09659
PLXNC1	Normal	Osteoarthritis	2.28862	4.5257	4.49486	9.57097e-05	0.00164711	1.09588
KCNJ5	Normal	Osteoarthritis	1.20805	4.49964	4.48205	9.92118e-05	0.00169052	1.06107
MIR6872	Normal	Osteoarthritis	1.82892	3.54133	4.47496	0.000101205	0.0017118	1.04181
IL1B	Normal	Osteoarthritis	-1.07598	6.95682	-4.47372	0.000101558	0.00171357	1.03844
GRIA2	Normal	Osteoarthritis	1.81251	1.3249	4.46891	0.000102938	0.00173262	1.02537
EGFR	Normal	Osteoarthritis	-1.07849	8.0273	-4.46433	0.00010427	0.00175077	1.01292
RRS1	Normal	Osteoarthritis	-1.14989	6.55601	-4.4543	0.000107244	0.00179199	0.985696
LILRB2	Normal	Osteoarthritis	1.45521	7.28999	4.45263	0.000107747	0.00179604	0.981166
TRAF3IP3	Normal	Osteoarthritis	1.93287	4.1786	4.4414	0.000111192	0.00184456	0.9507
EML1	Normal	Osteoarthritis	1.03032	7.79947	4.41968	0.00011817	0.00193704	0.891796
NDC80	Normal	Osteoarthritis	2.05142	3.14704	4.40076	0.000124602	0.00201376	0.840525
PTN	Normal	Osteoarthritis	1.13783	7.06944	4.39617	0.000126211	0.0020315	0.82811
KIF11	Normal	Osteoarthritis	1.47863	4.28599	4.39595	0.000126288	0.0020315	0.827519
LILRB1	Normal	Osteoarthritis	1.74503	6.25652	4.39502	0.00012662	0.00203211	0.824982
CD28	Normal	Osteoarthritis	1.4574	5.73289	4.3887	0.000128879	0.00205878	0.807877
ARHGAP22	Normal	Osteoarthritis	1.52676	5.87111	4.37702	0.000133158	0.00210762	0.776291
HLA-DOA	Normal	Osteoarthritis	1.31558	6.15165	4.34547	0.000145438	0.00227589	0.691007
TPSB2	Normal	Osteoarthritis	1.40582	8.39117	4.33029	0.00015174	0.00236379	0.65001
TPSAB1	Normal	Osteoarthritis	1.43805	8.38351	4.32382	0.000154508	0.00240125	0.632543
FADD	Normal	Osteoarthritis	1.15437	6.65644	4.32305	0.00015484	0.00240125	0.630468
PDE4B	Normal	Osteoarthritis	-1.55982	8.13447	-4.31813	0.000156983	0.00242357	0.617192
SELL	Normal	Osteoarthritis	1.24931	6.81618	4.31552	0.00015813	0.00243044	0.610157
CPVL	Normal	Osteoarthritis	1.22884	8.26933	4.31391	0.000158841	0.00243591	0.605824
PFKFB3	Normal	Osteoarthritis	-1.27836	7.85821	-4.29267	0.000168541	0.00255627	0.548567
IER3	Normal	Osteoarthritis	-1.8895	9.45382	-4.28183	0.000173713	0.00262318	0.51938
ACKR1	Normal	Osteoarthritis	-2.31164	8.68859	-4.27972	0.000174738	0.0026329	0.513696
ATM	Normal	Osteoarthritis	2.04253	5.73707	4.26715	0.000180966	0.00271304	0.479886
NOV	Normal	Osteoarthritis	1.16985	7.23435	4.26662	0.000181237	0.00271304	0.478443
TRAC	Normal	Osteoarthritis	1.09803	7.12437	4.25062	0.000189496	0.00283055	0.435426
CRABP2	Normal	Osteoarthritis	1.55525	6.28038	4.22934	0.000201061	0.00299034	0.378264
KCNQ1	Normal	Osteoarthritis	2.28421	5.81874	4.22411	0.000204008	0.00302116	0.364223
GNG7	Normal	Osteoarthritis	1.34627	5.20295	4.21885	0.000207011	0.00305253	0.350129
AGTR1	Normal	Osteoarthritis	-1.1188	7.63781	-4.21773	0.00020766	0.00305557	0.347109
BTN3A1	Normal	Osteoarthritis	2.08693	5.12267	4.19494	0.000221242	0.00320755	0.286008
MAOA	Normal	Osteoarthritis	-2.07561	5.70137	-4.18922	0.000224784	0.00324027	0.270694
HLA-DRA	Normal	Osteoarthritis	1.56262	11.5048	4.18715	0.000226079	0.00324995	0.265155
HAS1	Normal	Osteoarthritis	-1.98961	8.64106	-4.18645	0.000226521	0.00324995	0.26327
FCGR3A	Normal	Osteoarthritis	1.83806	9.05439	4.18484	0.000227536	0.00325774	0.258961
GCHFR	Normal	Osteoarthritis	1.44221	6.81065	4.18036	0.000230384	0.00328834	0.24697
THBS4	Normal	Osteoarthritis	1.30452	11.2189	4.17628	0.000233008	0.00331543	0.236055
IL1R2	Normal	Osteoarthritis	-2.57375	4.04981	-4.16809	0.00023837	0.00337088	0.214125
SLC7A5	Normal	Osteoarthritis	-2.32297	5.96396	-4.14651	0.000253076	0.00356424	0.156438
CD37	Normal	Osteoarthritis	1.92549	7.14741	4.14056	0.000257284	0.00360877	0.140552
CSRP2	Normal	Osteoarthritis	-1.20451	6.92822	-4.1343	0.000261782	0.003657	0.123855
NKX3-1	Normal	Osteoarthritis	-1.07866	6.39636	-4.13011	0.000264839	0.00369223	0.112674
ICAM3	Normal	Osteoarthritis	1.27204	6.10396	4.11919	0.000272972	0.0037903	0.0835431
TM4SF1	Normal	Osteoarthritis	-1.57324	8.61654	-4.10183	0.000286412	0.00396098	0.0372708
PLK2	Normal	Osteoarthritis	-1.29093	6.40983	-4.09744	0.000289911	0.00399793	0.02558
FAM47E	Normal	Osteoarthritis	-1.07639	6.18509	-4.09703	0.000290243	0.00399793	0.0244801
HIST1H1C	Normal	Osteoarthritis	-1.32955	6.2392	-4.08616	0.000299103	0.00409545	-0.00446083
GABRA4	Normal	Osteoarthritis	1.21064	7.69068	4.07765	0.000306221	0.00418035	-0.027093
PKIA	Normal	Osteoarthritis	1.48042	5.1946	4.06162	0.000320085	0.00434824	-0.0696945
RARRES3	Normal	Osteoarthritis	1.0468	7.82308	4.03932	0.000340408	0.00457034	-0.128896
ICAM1	Normal	Osteoarthritis	-1.44966	8.33817	-4.02922	0.00035002	0.00467212	-0.155667
SLC6A8	Normal	Osteoarthritis	-2.08534	5.3	-4.02845	0.00035077	0.0046731	-0.157725
RAG1	Normal	Osteoarthritis	1.68152	2.58782	4.02577	0.000353364	0.00468955	-0.164809
TNC	Normal	Osteoarthritis	1.37877	10.6985	4.02186	0.000357192	0.00472219	-0.175166
REST	Normal	Osteoarthritis	-1.26451	3.68496	-4.01917	0.000359854	0.00474828	-0.182302
H1F0	Normal	Osteoarthritis	-1.31886	8.42505	-4.00931	0.000369763	0.00486045	-0.208409
TMEM106C	Normal	Osteoarthritis	1.40596	5.99441	3.98071	0.000400039	0.0051698	-0.284014
FKBP5	Normal	Osteoarthritis	-3.51818	4.92089	-3.96503	0.000417662	0.0053277	-0.32541
FLJ10038	Normal	Osteoarthritis	-1.0234	5.53092	-3.96155	0.000421671	0.00536892	-0.334582
ITPKB	Normal	Osteoarthritis	1.27292	6.57508	3.94308	0.000443609	0.00563554	-0.383264
NID1	Normal	Osteoarthritis	-1.06151	7.30185	-3.94256	0.000444245	0.00563554	-0.384638
IFIT1	Normal	Osteoarthritis	1.66697	7.37006	3.93765	0.000450277	0.00570158	-0.397581
GABRB1	Normal	Osteoarthritis	1.29627	6.40927	3.93377	0.000455093	0.00574149	-0.407788
CRY1	Normal	Osteoarthritis	-1.14166	6.85789	-3.92892	0.000461185	0.00580774	-0.420547
RGS3	Normal	Osteoarthritis	1.22236	7.9329	3.90698	0.000489759	0.00608978	-0.478205
PPP3CC	Normal	Osteoarthritis	-1.18048	6.00522	-3.90554	0.000491695	0.00609221	-0.481989
IL11RA	Normal	Osteoarthritis	1.86241	6.61663	3.88761	0.000516423	0.00634375	-0.529031
CHST7	Normal	Osteoarthritis	-2.43227	4.79181	-3.88093	0.000525946	0.00640126	-0.546543
DUS4L	Normal	Osteoarthritis	1.06903	4.22947	3.8784	0.000529599	0.00641285	-0.553177
SCG2	Normal	Osteoarthritis	1.43346	6.70376	3.85972	0.000557339	0.00667742	-0.602094
APOB	Normal	Osteoarthritis	-1.05091	5.86878	-3.85578	0.000563355	0.00672096	-0.612378
RAC2	Normal	Osteoarthritis	2.04545	4.5576	3.84996	0.000572379	0.00677528	-0.627598
NFKB2	Normal	Osteoarthritis	-1.1588	5.83272	-3.82268	0.000616576	0.00717536	-0.698813
ZNF74	Normal	Osteoarthritis	1.43462	4.116	3.81839	0.00062383	0.00724757	-0.710008
BTC	Normal	Osteoarthritis	2.29431	3.63906	3.81742	0.00062548	0.00725452	-0.712536
NQO2	Normal	Osteoarthritis	1.12229	7.94988	3.79015	0.000673662	0.00769692	-0.783533
LTB	Normal	Osteoarthritis	1.4489	5.93009	3.78223	0.00068831	0.00783832	-0.804103
KCNA1	Normal	Osteoarthritis	1.22586	4.94194	3.77513	0.000701726	0.00796376	-0.822561
NPRL2	Normal	Osteoarthritis	1.5996	6.19568	3.77455	0.000702829	0.00796376	-0.824062
PTX3	Normal	Osteoarthritis	-2.46899	6.32687	-3.76658	0.000718196	0.00805897	-0.844739
CD14	Normal	Osteoarthritis	1.02569	10.6311	3.74733	0.000756701	0.00842257	-0.894649
CCL3	Normal	Osteoarthritis	-1.72158	7.96784	-3.73373	0.000785114	0.00865507	-0.92986
FDXR	Normal	Osteoarthritis	1.43092	3.69414	3.71026	0.000836586	0.00904903	-0.990493
CLDN5	Normal	Osteoarthritis	-1.98617	6.18948	-3.67944	0.000909193	0.00968823	-1.06991
MARCO	Normal	Osteoarthritis	1.09942	10.0619	3.65679	0.000966437	0.0101513	-1.12813
ZNF135	Normal	Osteoarthritis	2.10744	2.49684	3.65228	0.000978219	0.0102438	-1.13968
FSCN1	Normal	Osteoarthritis	1.44479	5.30875	3.64773	0.000990292	0.0103118	-1.15137
MDK	Normal	Osteoarthritis	1.52399	5.68996	3.64217	0.00100521	0.0104472	-1.16562
CSF2RA	Normal	Osteoarthritis	1.92016	5.15487	3.63126	0.00103513	0.0107258	-1.19356
HERC4	Normal	Osteoarthritis	1.30737	3.64277	3.62781	0.00104477	0.0107342	-1.20239
SNRPA1	Normal	Osteoarthritis	-1.04047	8.16049	-3.61831	0.00107178	0.0109361	-1.2267
DPYS	Normal	Osteoarthritis	1.61201	4.27331	3.59599	0.00113791	0.0114304	-1.28369
PNMT	Normal	Osteoarthritis	-1.43939	4.86833	-3.5913	0.00115229	0.0115413	-1.29564
ALDH5A1	Normal	Osteoarthritis	1.38175	3.45107	3.5906	0.00115448	0.0115465	-1.29745
ANG	Normal	Osteoarthritis	-1.2189	6.58407	-3.58856	0.00116079	0.0115806	-1.30264
APOE	Normal	Osteoarthritis	1.32518	9.70556	3.58195	0.00118151	0.0117318	-1.31947
ABCA3	Normal	Osteoarthritis	1.17805	4.97803	3.57327	0.00120929	0.011956	-1.34157
HIBCH	Normal	Osteoarthritis	1.13471	5.13875	3.57201	0.00121337	0.0119792	-1.34478
CCL20	Normal	Osteoarthritis	-2.94564	3.36921	-3.56523	0.00123557	0.012129	-1.36202
LRP3	Normal	Osteoarthritis	1.17327	5.28012	3.55024	0.00128606	0.0125002	-1.4001
TOB1	Normal	Osteoarthritis	-1.04803	8.71646	-3.54628	0.00129974	0.0126153	-1.41015
AMPH	Normal	Osteoarthritis	-1.03689	6.11873	-3.52222	0.00138584	0.0133571	-1.47108
NKX3-2	Normal	Osteoarthritis	1.57684	5.5813	3.51984	0.00139465	0.0134233	-1.4771
CTSS	Normal	Osteoarthritis	1.09336	9.28363	3.51284	0.00142092	0.0136191	-1.49482
TBXAS1	Normal	Osteoarthritis	1.11824	6.82031	3.49341	0.00149626	0.014062	-1.54386
SLC6A3	Normal	Osteoarthritis	-1.95521	5.75842	-3.49337	0.00149642	0.014062	-1.54396
CSN1S1	Normal	Osteoarthritis	3.57778	7.53981	3.48586	0.00152657	0.0142244	-1.56288
FIGF	Normal	Osteoarthritis	-1.54155	5.9615	-3.47989	0.00155097	0.0144055	-1.57793
CDO1	Normal	Osteoarthritis	-1.33454	9.88287	-3.46983	0.00159288	0.0145789	-1.60321
CDON	Normal	Osteoarthritis	1.83297	4.49867	3.46851	0.00159849	0.0145915	-1.60654
STK17B	Normal	Osteoarthritis	-1.17547	6.17396	-3.45805	0.00164341	0.0149226	-1.63282
BRD4	Normal	Osteoarthritis	-1.06104	8.0911	-3.45001	0.00167879	0.0151245	-1.653
PSG7	Normal	Osteoarthritis	-1.15057	4.77481	-3.44695	0.00169241	0.0152228	-1.66066
CDKN2B	Normal	Osteoarthritis	1.12787	1.01046	3.44109	0.00171889	0.0153853	-1.67536
IFI27	Normal	Osteoarthritis	1.18849	10.0134	3.4331	0.00175557	0.0155922	-1.69536
ARRB2	Normal	Osteoarthritis	1.42003	7.63468	3.41638	0.00183483	0.0160448	-1.73718
NEUROG3	Normal	Osteoarthritis	-1.6281	3.05203	-3.41114	0.00186033	0.0161531	-1.75024
SNX17	Normal	Osteoarthritis	1.28284	7.49582	3.4108	0.00186203	0.0161531	-1.7511
HLA-DQA1	Normal	Osteoarthritis	4.25313	6.53065	3.41056	0.00186319	0.0161531	-1.75169
LMOD1	Normal	Osteoarthritis	-1.99289	6.33948	-3.40585	0.00188649	0.0162937	-1.76346
NAIP	Normal	Osteoarthritis	1.48424	5.64658	3.40156	0.00190795	0.0164379	-1.77416
KCNK3	Normal	Osteoarthritis	-1.21232	6.33848	-3.39767	0.00192758	0.0165657	-1.78384
FOXO4	Normal	Osteoarthritis	-1.04995	4.38601	-3.39064	0.00196359	0.0168123	-1.80135
MMP13	Normal	Osteoarthritis	1.86799	3.79416	3.3798	0.0020204	0.0170867	-1.82832
PSPH	Normal	Osteoarthritis	1.70771	4.44799	3.37457	0.00204835	0.0171342	-1.84131
THBD	Normal	Osteoarthritis	-1.09416	7.95961	-3.34098	0.0022371	0.0183408	-1.92458
LCK	Normal	Osteoarthritis	1.13414	5.24935	3.33117	0.00229525	0.0187229	-1.94881
LIF	Normal	Osteoarthritis	-2.50186	5.22027	-3.32433	0.00233671	0.0190385	-1.9657
DNASE1L3	Normal	Osteoarthritis	1.39229	7.21054	3.31093	0.00241999	0.0195612	-1.99874
TSC22D3	Normal	Osteoarthritis	-1.03136	10.2576	-3.3092	0.00243092	0.0196208	-2.00299
C4A	Normal	Osteoarthritis	1.11314	9.30074	3.30251	0.00247379	0.0198538	-2.01948
LOXL1	Normal	Osteoarthritis	1.55295	7.95302	3.30245	0.00247418	0.0198538	-2.01963
THBS1	Normal	Osteoarthritis	-1.18538	6.22481	-3.28198	0.00260974	0.0206772	-2.06991
PLK3	Normal	Osteoarthritis	-1.23182	5.95122	-3.26517	0.00272637	0.021429	-2.11109
NAGPA	Normal	Osteoarthritis	1.13631	6.24692	3.25329	0.00281184	0.0219508	-2.14015
TNFRSF11B	Normal	Osteoarthritis	1.11972	4.73583	3.24965	0.0028385	0.0220777	-2.14903
CDK5	Normal	Osteoarthritis	1.34829	4.14285	3.24422	0.00287873	0.0222964	-2.16227
KIF1C	Normal	Osteoarthritis	-1.39884	4.21058	-3.23057	0.00298238	0.0229191	-2.19555
DDX3Y	Normal	Osteoarthritis	-2.61502	5.46699	-3.22978	0.00298849	0.0229264	-2.19747
NDUFB7	Normal	Osteoarthritis	1.17971	6.38647	3.22959	0.00298997	0.0229264	-2.19794
SPON1	Normal	Osteoarthritis	1.10129	7.54052	3.22564	0.0030207	0.0231107	-2.20755
NUDT1	Normal	Osteoarthritis	1.2603	4.04689	3.2194	0.00306984	0.0234347	-2.22273
TAC1	Normal	Osteoarthritis	2.22557	4.77951	3.21814	0.00307985	0.023471	-2.22579
ATF7IP	Normal	Osteoarthritis	1.13322	4.1801	3.21795	0.0030814	0.023471	-2.22626
GSTZ1	Normal	Osteoarthritis	1.31389	3.68511	3.19423	0.003276	0.0245736	-2.2838
ZKSCAN7	Normal	Osteoarthritis	1.9294	4.38111	3.17151	0.00347342	0.0256364	-2.33873
SELE	Normal	Osteoarthritis	-1.87647	6.09374	-3.16849	0.00350051	0.0258088	-2.34602
UGCG	Normal	Osteoarthritis	-1.12965	8.66153	-3.16076	0.00357072	0.0261865	-2.36465
AKR1B10	Normal	Osteoarthritis	-1.27684	5.62442	-3.15791	0.00359697	0.026351	-2.37152
RAMP2	Normal	Osteoarthritis	-2.06103	5.48285	-3.15673	0.00360785	0.0264028	-2.37435
FMNL1	Normal	Osteoarthritis	1.17946	6.37309	3.15303	0.00364231	0.0265985	-2.38326
BIN3-IT1	Normal	Osteoarthritis	-1.1236	5.1346	-3.13975	0.00376851	0.027313	-2.41519
SAA1	Normal	Osteoarthritis	-2.04988	3.42371	-3.12646	0.00389896	0.0280278	-2.44707
BDKRB2	Normal	Osteoarthritis	-1.01322	7.78343	-3.11943	0.0039697	0.0283591	-2.46391
GRM1	Normal	Osteoarthritis	1.37621	3.70272	3.11638	0.00400076	0.0285354	-2.47121
ACP5	Normal	Osteoarthritis	1.103	8.89584	3.11022	0.00406419	0.0288252	-2.48593
GPM6A	Normal	Osteoarthritis	1.11192	3.25695	3.10478	0.00412104	0.0291386	-2.49893
PTHLH	Normal	Osteoarthritis	1.37725	4.28676	3.09138	0.00426422	0.0299059	-2.53089
STMN2	Normal	Osteoarthritis	1.31352	3.97304	3.08482	0.00433604	0.0302558	-2.54651
DLGAP5	Normal	Osteoarthritis	1.21091	4.17682	3.07631	0.00443097	0.0308247	-2.56675
IGLL1	Normal	Osteoarthritis	1.32344	3.85459	3.07543	0.00444089	0.0308626	-2.56884
MYH4	Normal	Osteoarthritis	1.35012	1.9377	3.05335	0.00469705	0.0321252	-2.62123
VAMP8	Normal	Osteoarthritis	1.30809	8.90407	3.04746	0.00476761	0.0323513	-2.63515
AREG	Normal	Osteoarthritis	-1.96864	4.09174	-3.03914	0.00486915	0.032917	-2.65482
P2RX7	Normal	Osteoarthritis	1.01644	5.9105	3.0321	0.00495668	0.0333068	-2.67144
CYP3A7	Normal	Osteoarthritis	1.33948	4.23808	3.02551	0.00503994	0.0337348	-2.68697
SRD5A1	Normal	Osteoarthritis	1.16742	4.44672	3.0204	0.00510545	0.0339102	-2.69902
FOSL1	Normal	Osteoarthritis	-2.31379	4.33927	-3.01782	0.00513876	0.0340659	-2.70508
PBXIP1	Normal	Osteoarthritis	1.56849	4.51211	3.0032	0.00533173	0.034889	-2.73943
OLFM1	Normal	Osteoarthritis	-1.07557	5.99811	-3.00306	0.00533371	0.034889	-2.73978
BHLHE40	Normal	Osteoarthritis	-1.00763	9.46067	-2.99206	0.00548335	0.0358	-2.76555
RGS1	Normal	Osteoarthritis	-1.75655	5.34584	-2.98842	0.00553388	0.0359598	-2.77409
MYOM2	Normal	Osteoarthritis	1.32776	4.2048	2.97844	0.00567432	0.0366518	-2.79742
P2RY2	Normal	Osteoarthritis	-1.08799	3.20439	-2.97203	0.00576646	0.0371216	-2.8124
FMO1	Normal	Osteoarthritis	1.5089	5.29155	2.96256	0.00590494	0.0378564	-2.83447
ZNF134	Normal	Osteoarthritis	1.2252	5.14934	2.95947	0.00595085	0.0380601	-2.84167
FGFR4	Normal	Osteoarthritis	1.22566	3.93543	2.95806	0.00597194	0.0381243	-2.84496
MSR1	Normal	Osteoarthritis	1.45399	5.46597	2.94982	0.00609639	0.0387396	-2.86413
WIF1	Normal	Osteoarthritis	1.89309	3.77695	2.93998	0.00624815	0.0395582	-2.88698
VCAM1	Normal	Osteoarthritis	1.27679	10.6993	2.93578	0.00631396	0.0398287	-2.89671
CH25H	Normal	Osteoarthritis	-1.27083	6.15231	-2.93281	0.00636094	0.0400519	-2.90359
TEAD3	Normal	Osteoarthritis	-1.04346	5.64094	-2.92334	0.00651301	0.0408975	-2.92552
TNFSF12	Normal	Osteoarthritis	1.39598	5.16186	2.92142	0.00654419	0.0409814	-2.92996
PLS1	Normal	Osteoarthritis	-1.33717	4.86771	-2.92008	0.00656612	0.0410442	-2.93306
NOS3	Normal	Osteoarthritis	-1.38163	4.42507	-2.91572	0.00663778	0.0411197	-2.94313
LIPF	Normal	Osteoarthritis	1.19334	4.07608	2.88605	0.00714558	0.0434081	-3.01147
CLU	Normal	Osteoarthritis	1.00017	11.5793	2.87103	0.00741644	0.0447592	-3.04592
SV2B	Normal	Osteoarthritis	1.10964	7.82	2.87084	0.00741987	0.0447592	-3.04635
CHIT1	Normal	Osteoarthritis	1.28369	3.95793	2.87032	0.00742954	0.0447784	-3.04755
SOX13	Normal	Osteoarthritis	-1.02197	5.94838	-2.86158	0.00759165	0.045248	-3.06753
ADH1C	Normal	Osteoarthritis	-1.92051	4.64441	-2.86153	0.0075927	0.045248	-3.06766
RPS4Y1	Normal	Osteoarthritis	-2.83024	7.25006	-2.8579	0.00766109	0.0455376	-3.07595
HSD11B2	Normal	Osteoarthritis	1.5307	3.29631	2.85682	0.00768151	0.0455413	-3.07841
PLEC	Normal	Osteoarthritis	1.73553	6.28585	2.8532	0.0077505	0.0458322	-3.08668
RALGPS1	Normal	Osteoarthritis	1.25941	3.3856	2.84851	0.00784055	0.0462114	-3.09736
TST	Normal	Osteoarthritis	1.21194	6.07559	2.83334	0.00813902	0.0471995	-3.13189
REN	Normal	Osteoarthritis	1.04431	4.14435	2.82706	0.00826572	0.0477737	-3.14616
PLXNA2	Normal	Osteoarthritis	1.11134	4.11829	2.81619	0.00848939	0.0488618	-3.17081
DNALI1	Normal	Osteoarthritis	1.3696	3.87005	2.81467	0.00852121	0.048954	-3.17426
SENP3	Normal	Osteoarthritis	-1.09861	5.53606	-2.81452	0.00852428	0.048954	-3.17459
CCL25	Normal	Osteoarthritis	-1.01302	3.63973	-2.81351	0.00854534	0.048954	-3.17687
SERPINE1	Normal	Osteoarthritis	-1.52489	7.05168	-2.81339	0.00854797	0.048954	-3.17716
